# Supplementary material for: Fluorination-triggered tandem cyclization of styrene-type carboxylic acids to access 3-aryl isocoumarin derivatives under microwave irradiation
Source: Royal Society of Chemistry journal article supplement (doi:10.1039/c9ob00509a), 2019-01-01
Supplement: c9ob00509a1.pdf [file c9ob00509a1.pdf]

# Supporting Information

## Fluorination-Triggered Tandem Cyclization of Styrene-type Carboxylic Acid to Access 3-Aryl Isocoumarin Derivatives under Microwave Irradiation

Jinwei Yuan,<sup>a,\*</sup> Fanlin Zeng,<sup>a</sup> Wenpeng Mai,<sup>b</sup> Liangru Yang,<sup>a</sup> Yongmei Xiao,<sup>a</sup>

Pu Mao,<sup>a</sup> Donghui Wei<sup>c</sup>

<sup>a</sup> School of Chemistry & Chemical Engineering, Henan University of Technology; Academician Workstation for Natural Medicinal Chemistry of Henan Province, Zhengzhou 450001, P. R. China

<sup>b</sup> School of Materials and Chemical Engineering, Henan Institute of Engineering; Zhengzhou 451191, P. R. China

<sup>c</sup> College of Chemistry and Molecular Engineering, Zhengzhou University, Zhengzhou 450001, P. R. China

**\*Corresponding authors:**

**E-mail:** [yuanjinweigs@126.com](mailto:yuanjinweigs@126.com) (Jinwei Yuan)

---

### Contents

1. Screening the reaction conditions
2. Copies of spectra of products

## 1. Screening the reaction condition

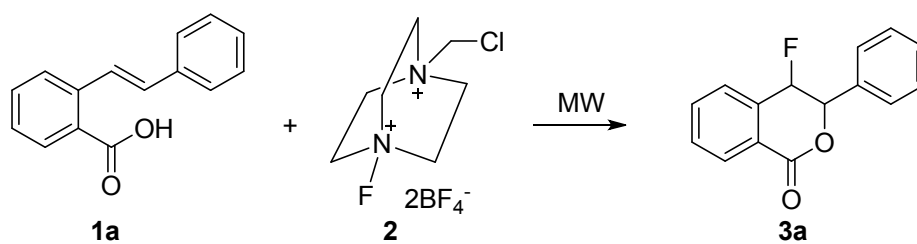

**Table S1** Screening the molar ratio of reaction substrates<sup>a</sup>

| Entry | The molar ratio of <b>1a</b> and <b>2</b> | Yields (%) <sup>b</sup> |
|-------|-------------------------------------------|-------------------------|
| 1     | 2:1                                       | 50                      |
| 2     | 1:1                                       | 58                      |
| 3     | 1:1.2                                     | 63                      |
| 4     | 1:1.5                                     | 70                      |
| 5     | 1:2.0                                     | 61                      |

<sup>a</sup> Reaction conditions: (E)-2-styrylbenzoic acid **1a** (0.2 mmol, 44.8 mg), Selectfluor reagent **2**, in 3.0 mL  $\text{CH}_3\text{CN}$  solvent, 100 °C for 0.5 h.

<sup>b</sup> Isolated yield.

## 2. Copies of spectra of products

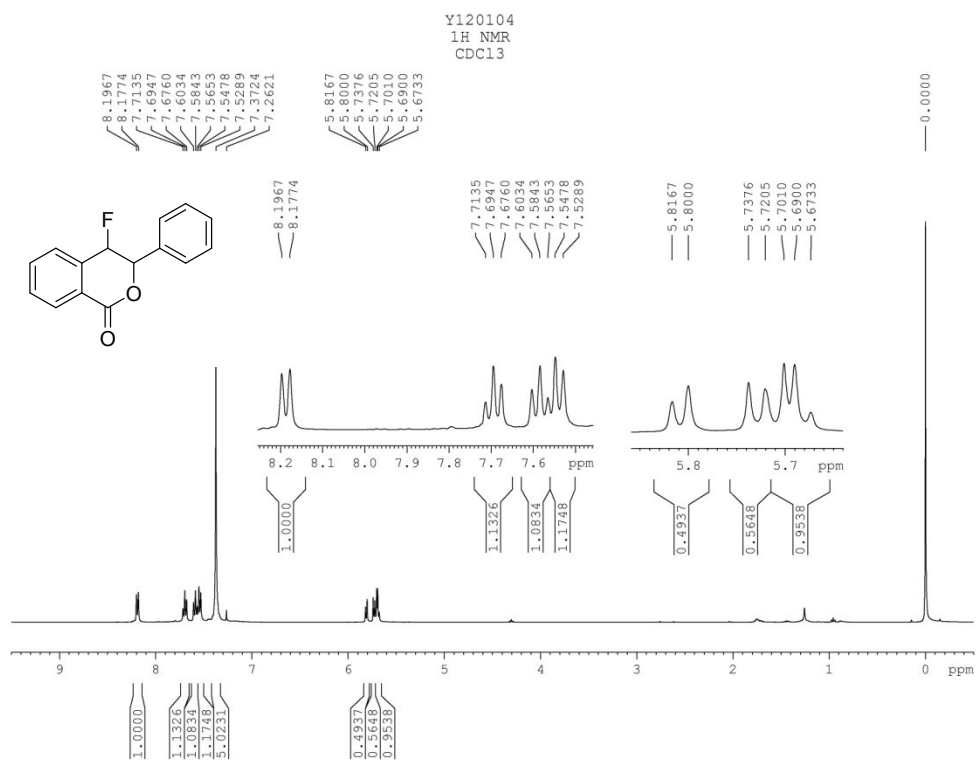

Fig. 1 <sup>1</sup>H NMR spectrum of compound 3a

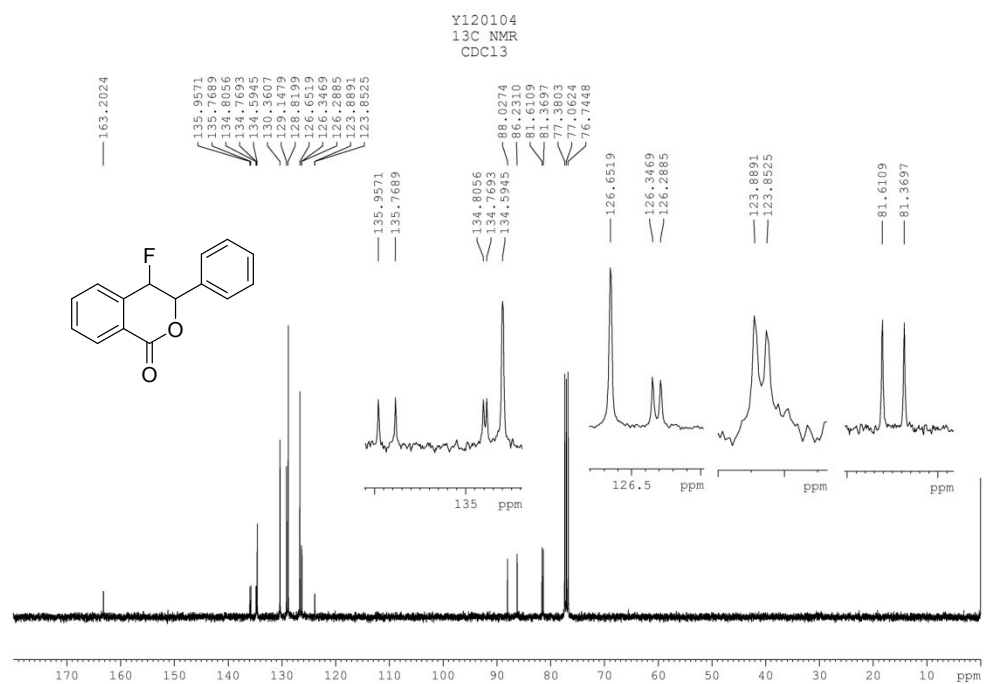

Fig. 2 <sup>13</sup>C NMR spectrum of compound 3a

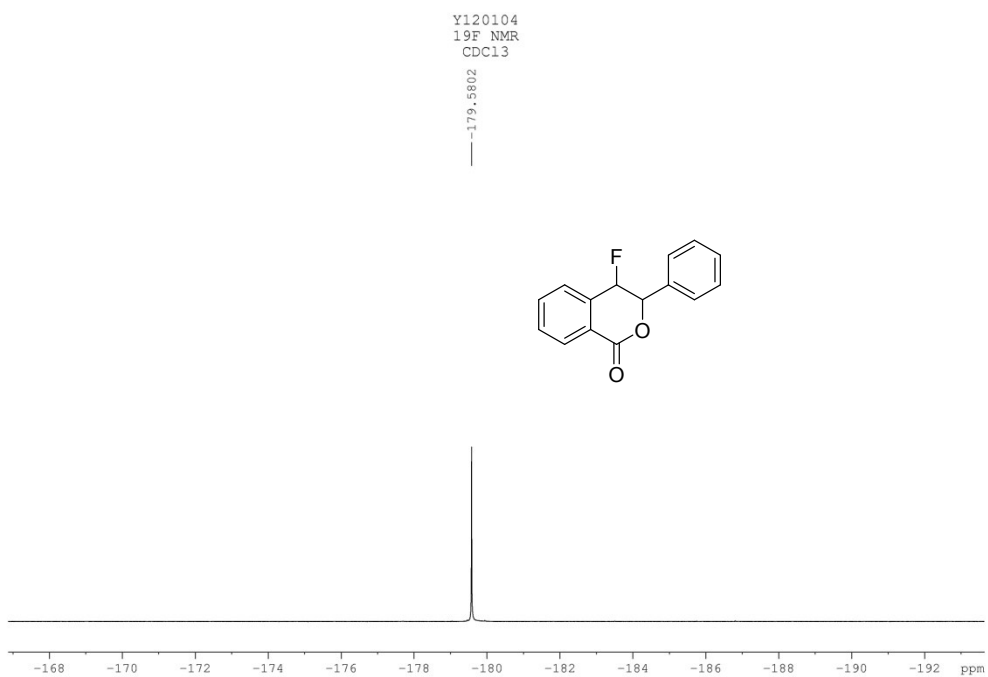

Fig. 3 <sup>19</sup>F NMR spectrum of compound 3a

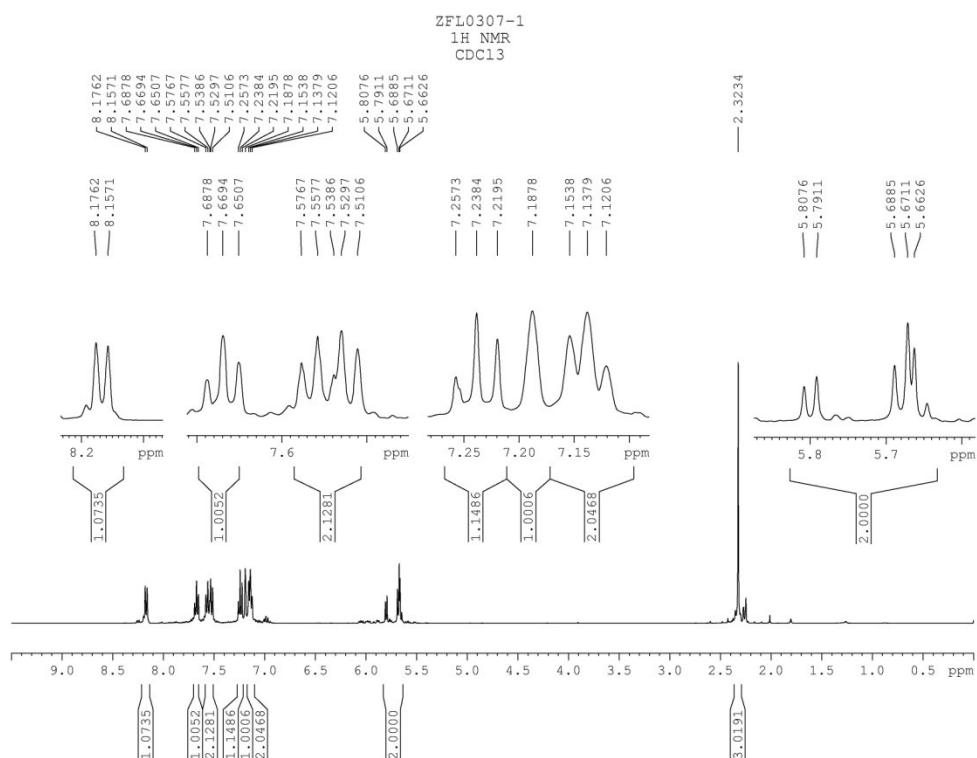

Fig. 4 <sup>1</sup>H NMR spectrum of compound 3b

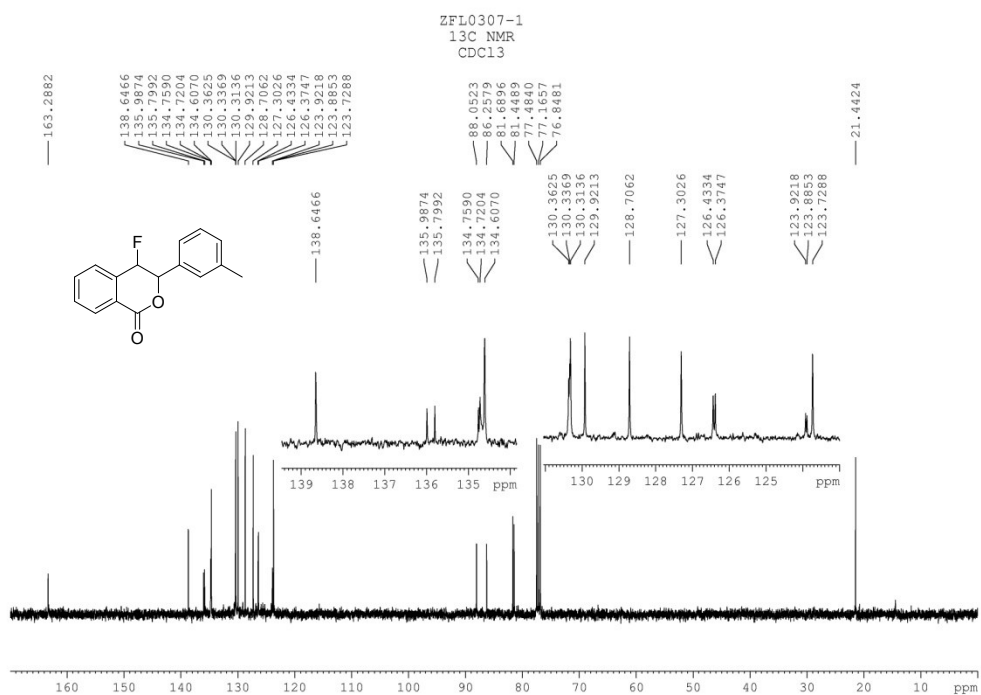

Fig. 5 <sup>13</sup>C NMR spectrum of compound **3b**

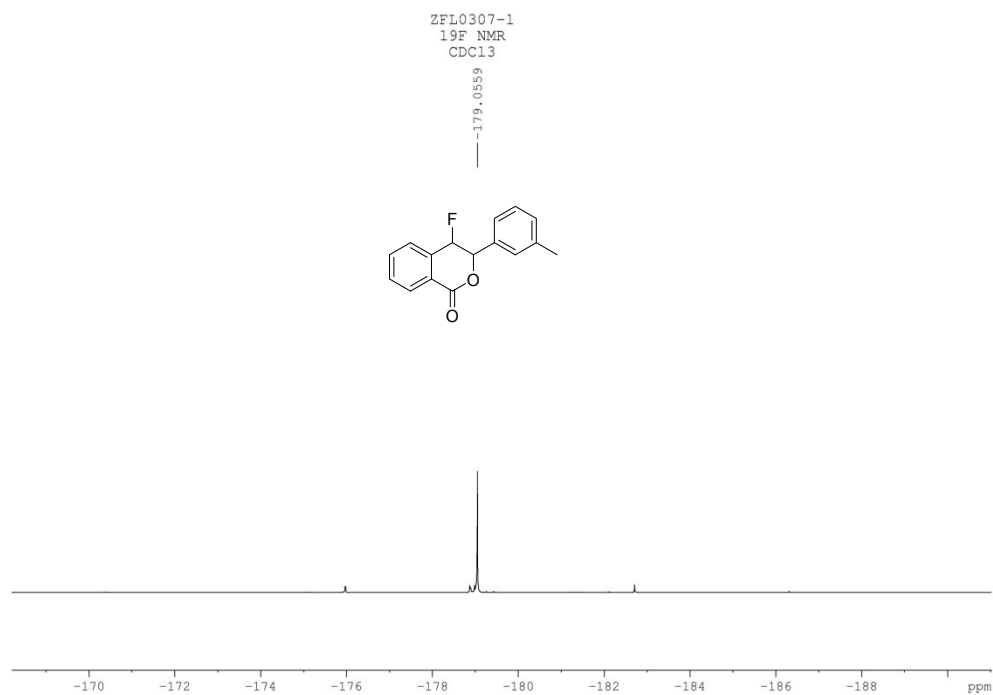

Fig. 6 <sup>19</sup>F NMR spectrum of compound **3b**

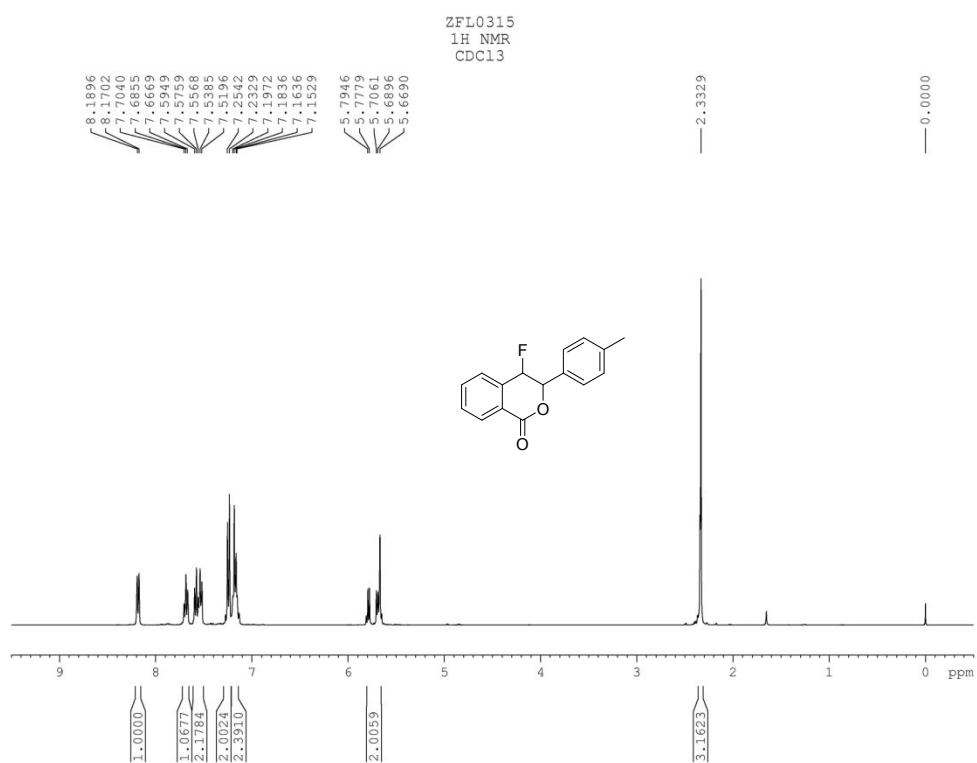

Fig. 7 <sup>1</sup>H NMR spectrum of compound 3c

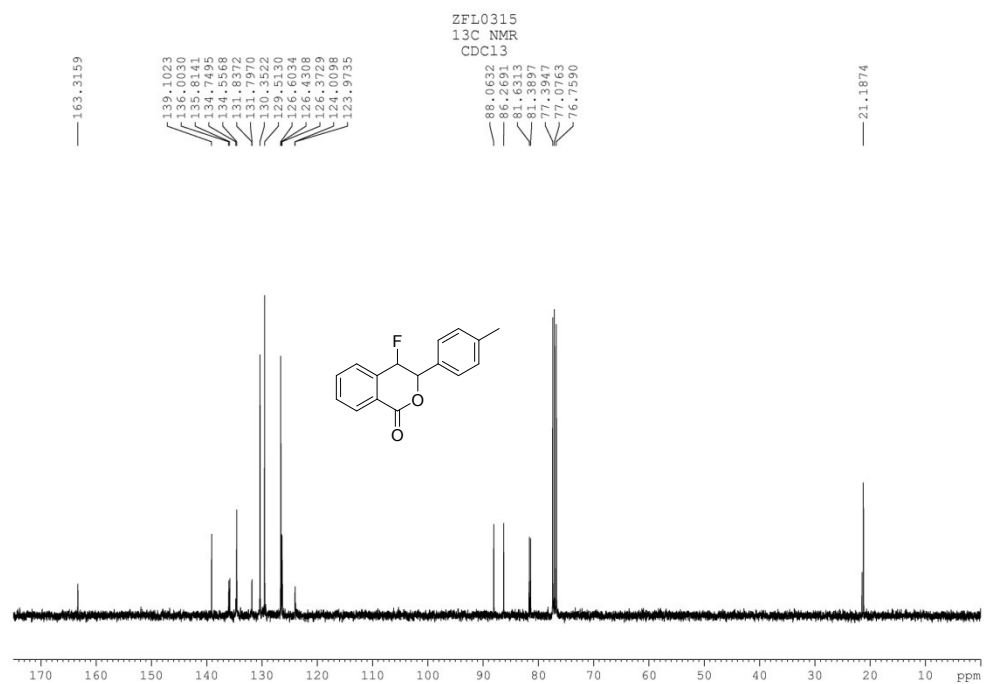

Fig. 8 <sup>13</sup>C NMR spectrum of compound 3c

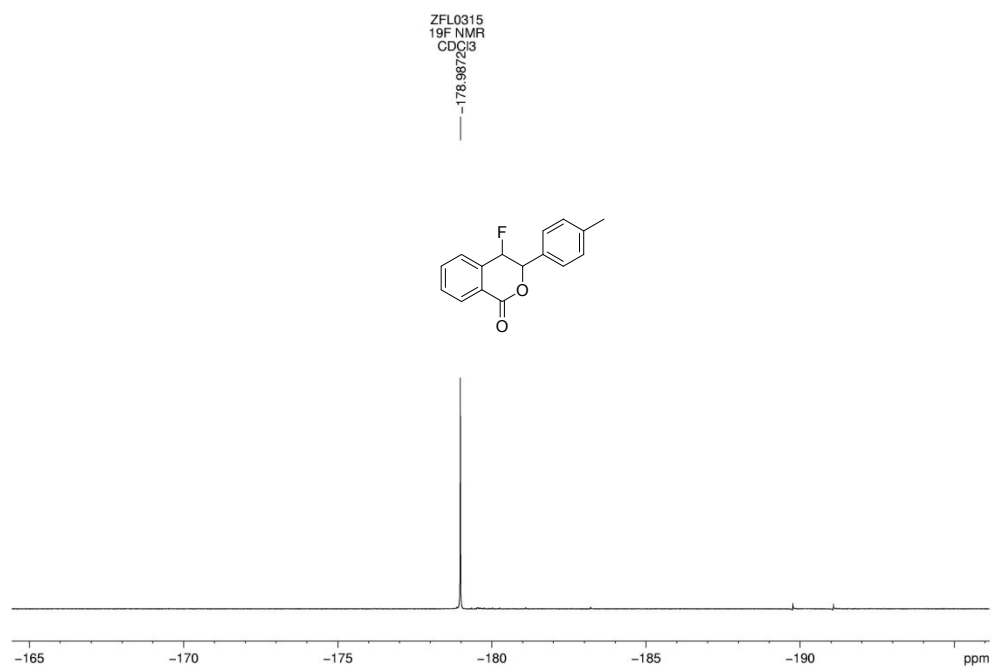

Fig. 9 <sup>19</sup>F NMR spectrum of compound 3c

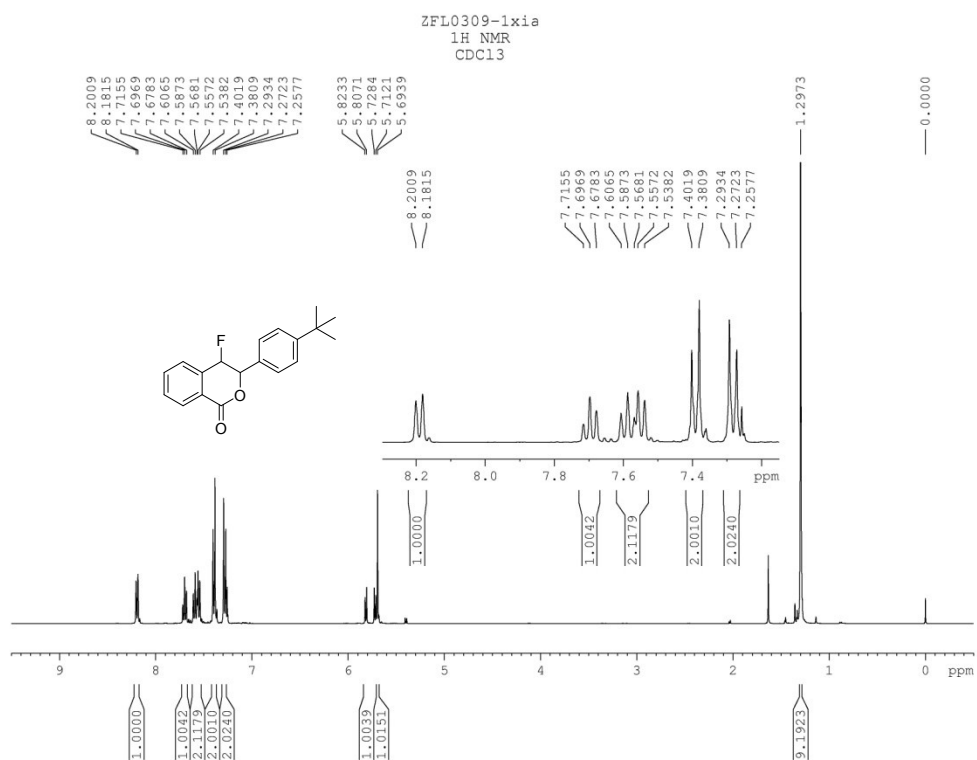

Fig. 10 <sup>1</sup>H NMR spectrum of compound 3d

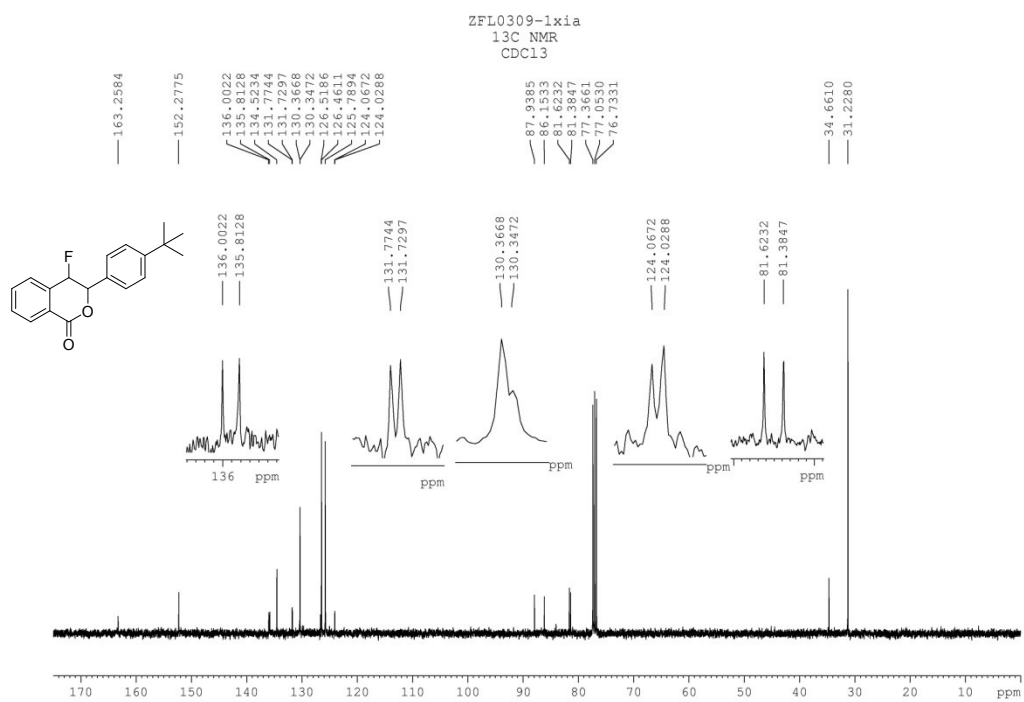

Fig. 11 <sup>13</sup>C NMR spectrum of compound 3d

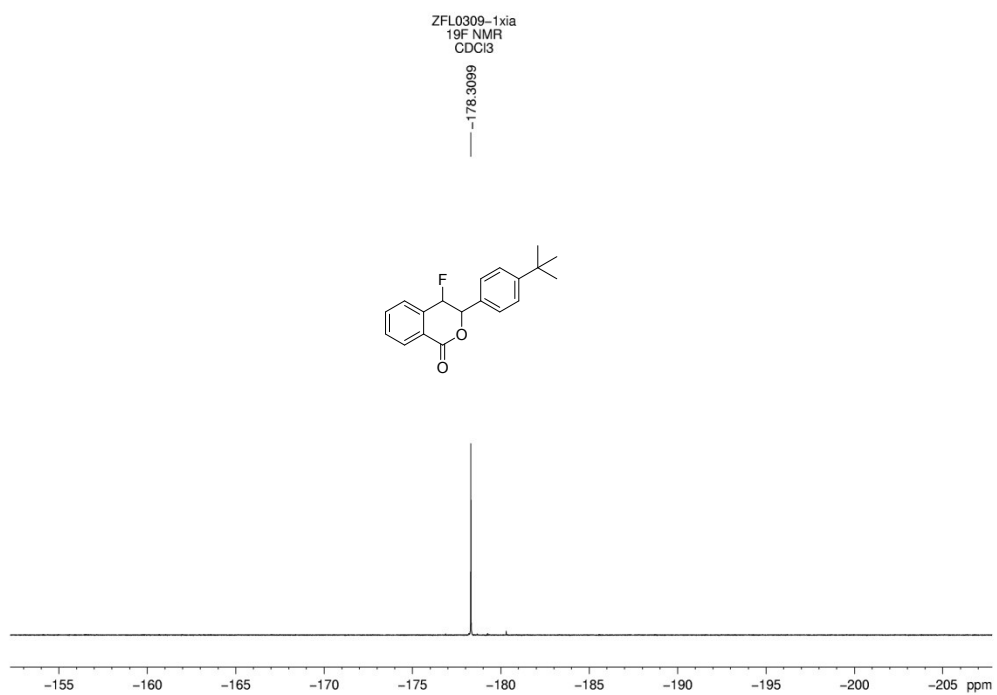

Fig. 12 <sup>19</sup>F NMR spectrum of compound 3d



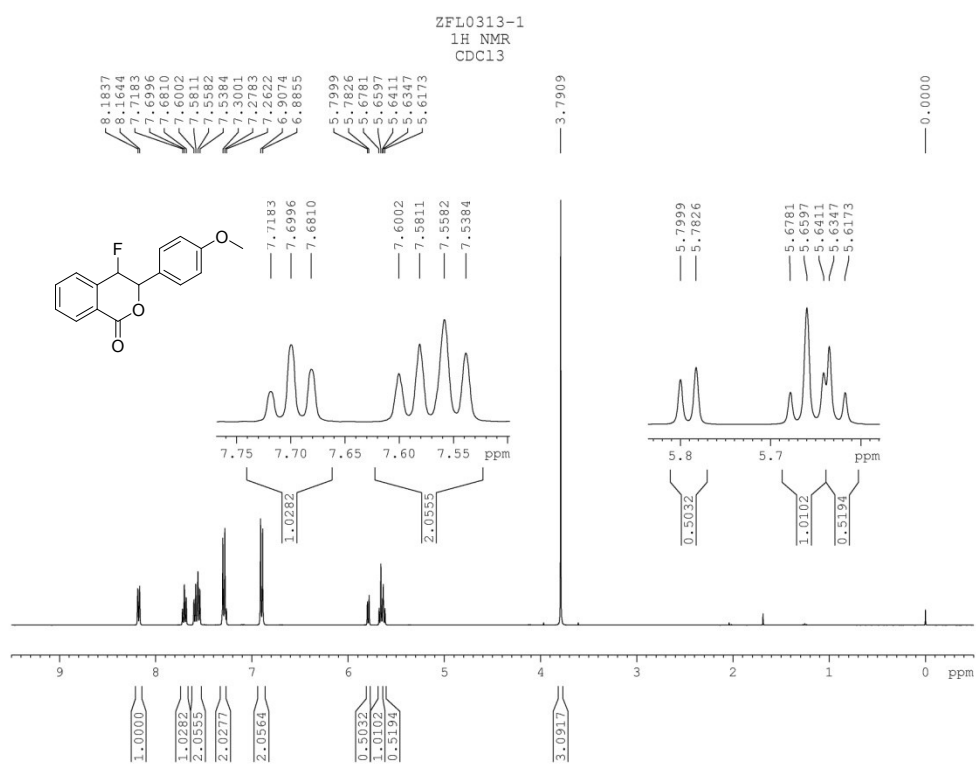

Fig. 13 <sup>1</sup>H NMR spectrum of compound 3e

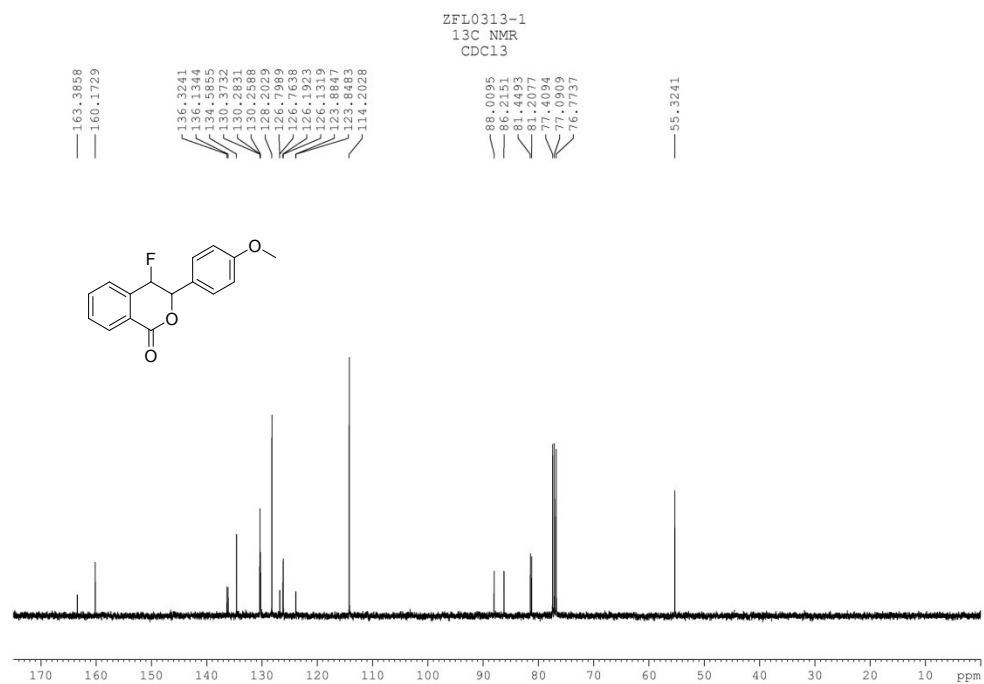

Fig. 14 <sup>13</sup>C NMR spectrum of compound 3e

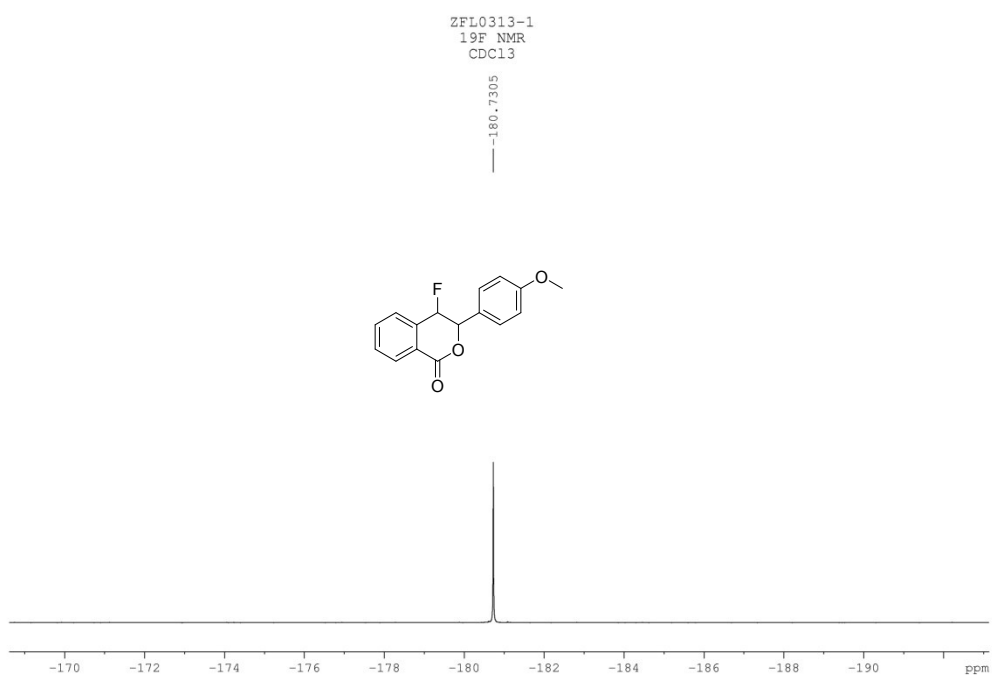

Fig. 15 <sup>19</sup>F NMR spectrum of compound 3e

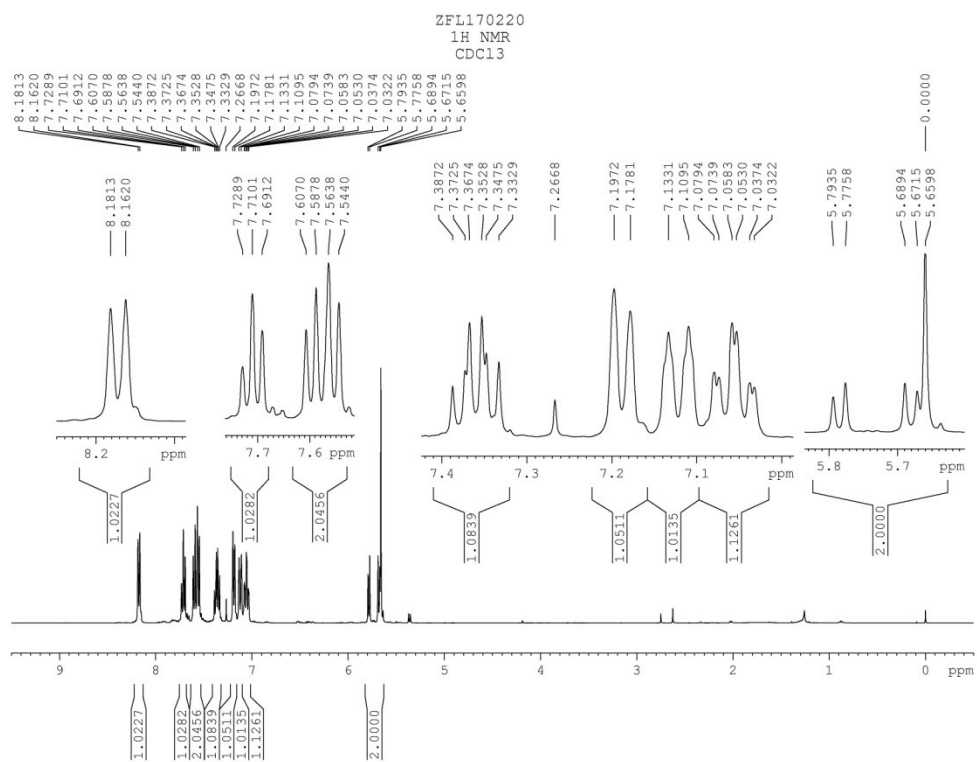

Fig. 16 <sup>1</sup>H NMR spectrum of compound 3f

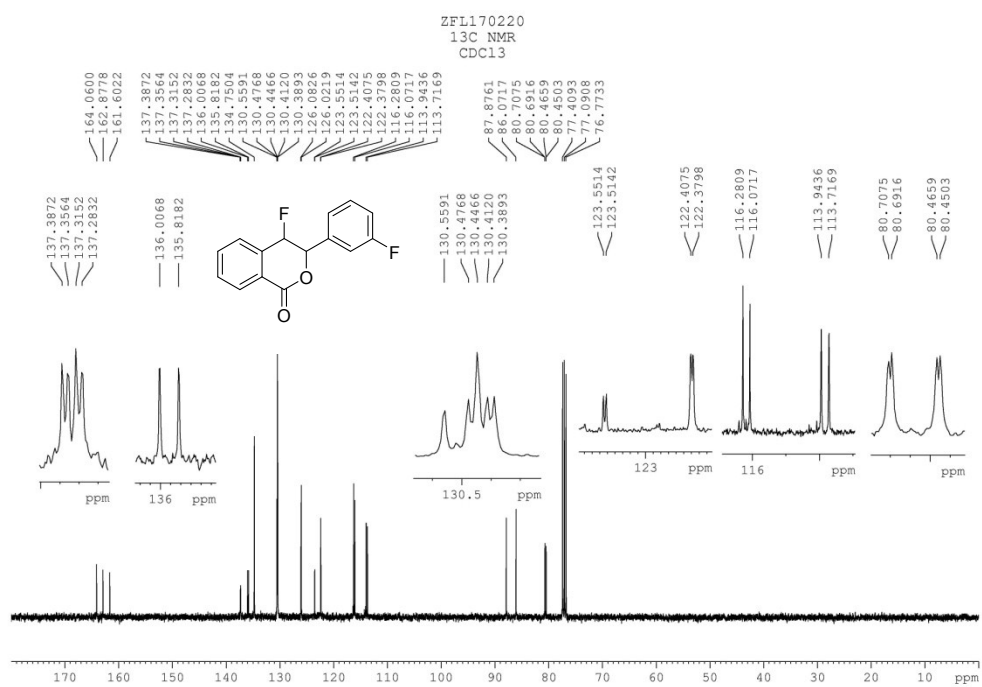

Fig. 17 <sup>13</sup>C NMR spectrum of compound **3f**

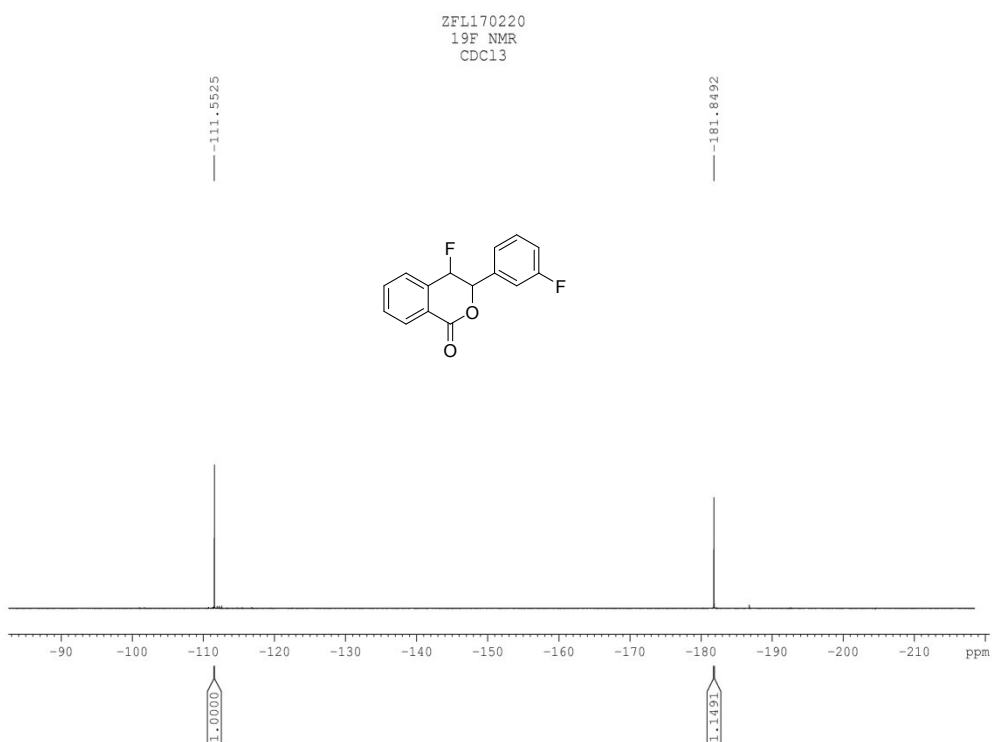

Fig. 18 <sup>19</sup>F NMR spectrum of compound **3f**

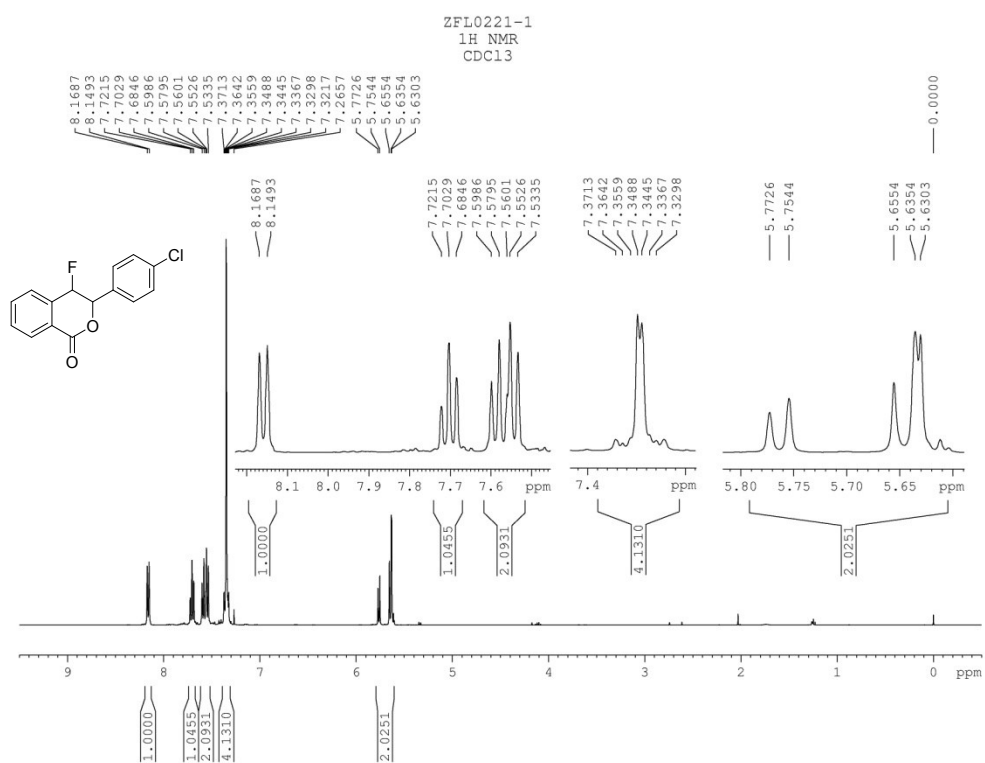

Fig. 19 <sup>1</sup>H NMR spectrum of compound 3g

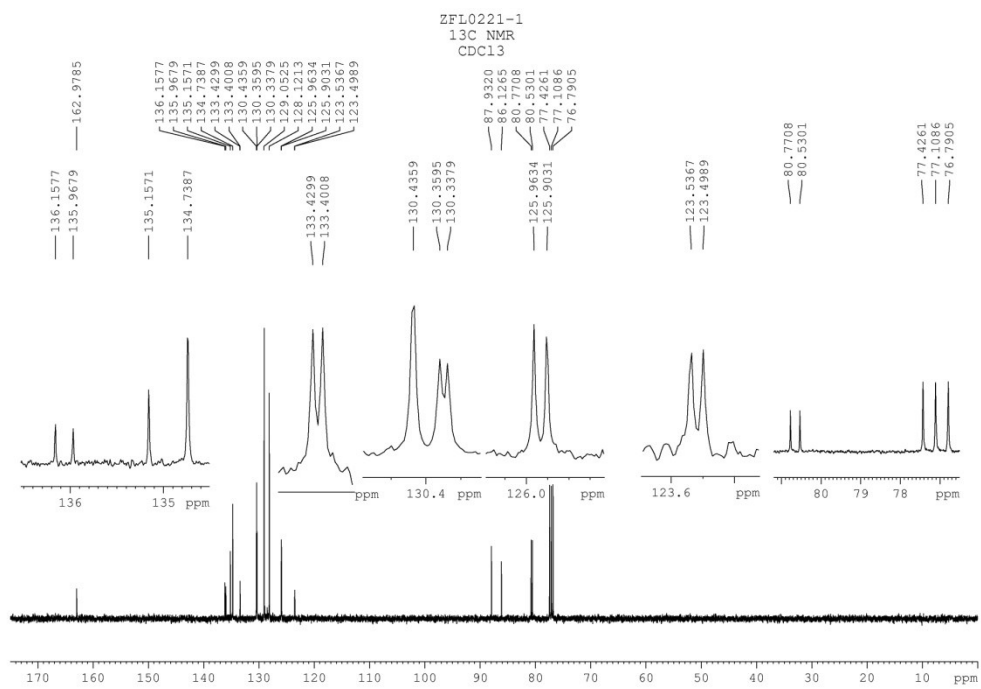

Fig. 20 <sup>13</sup>C NMR spectrum of compound 3g

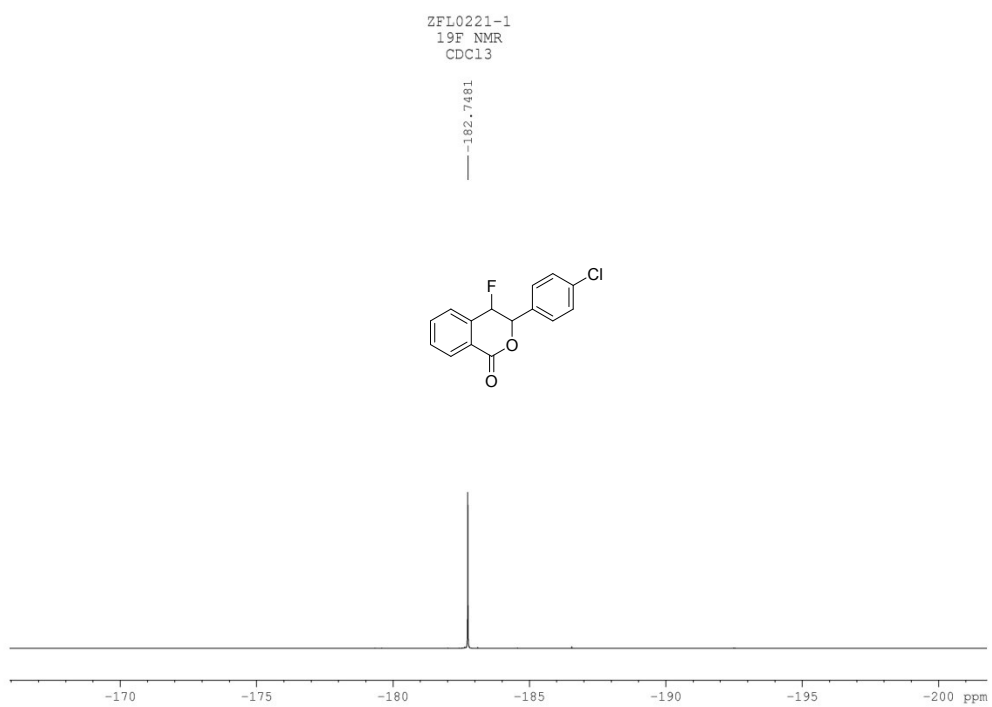

Fig. 21 <sup>19</sup>F NMR spectrum of compound 3g

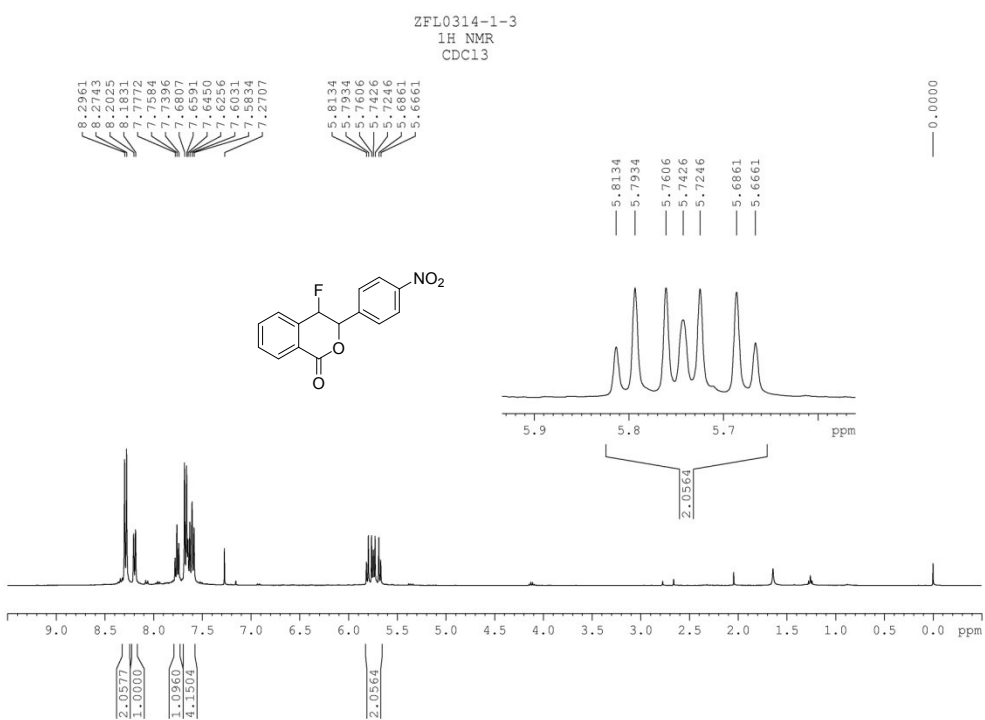

Fig. 22 <sup>1</sup>H NMR spectrum of compound 3h

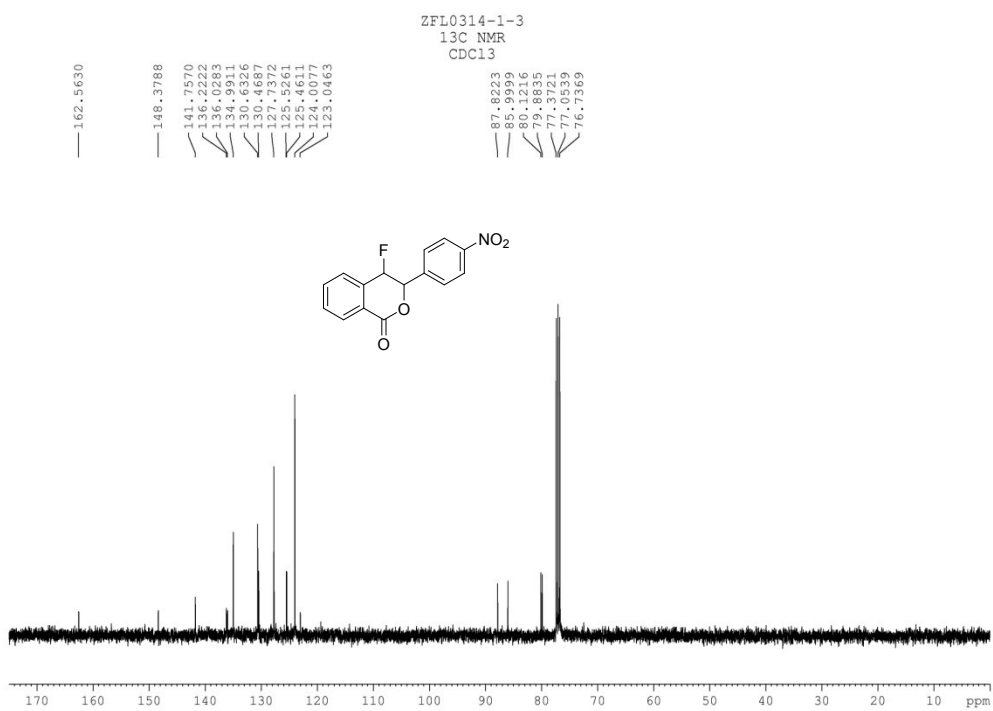

**Fig. 23** <sup>13</sup>C NMR spectrum of compound **3h**

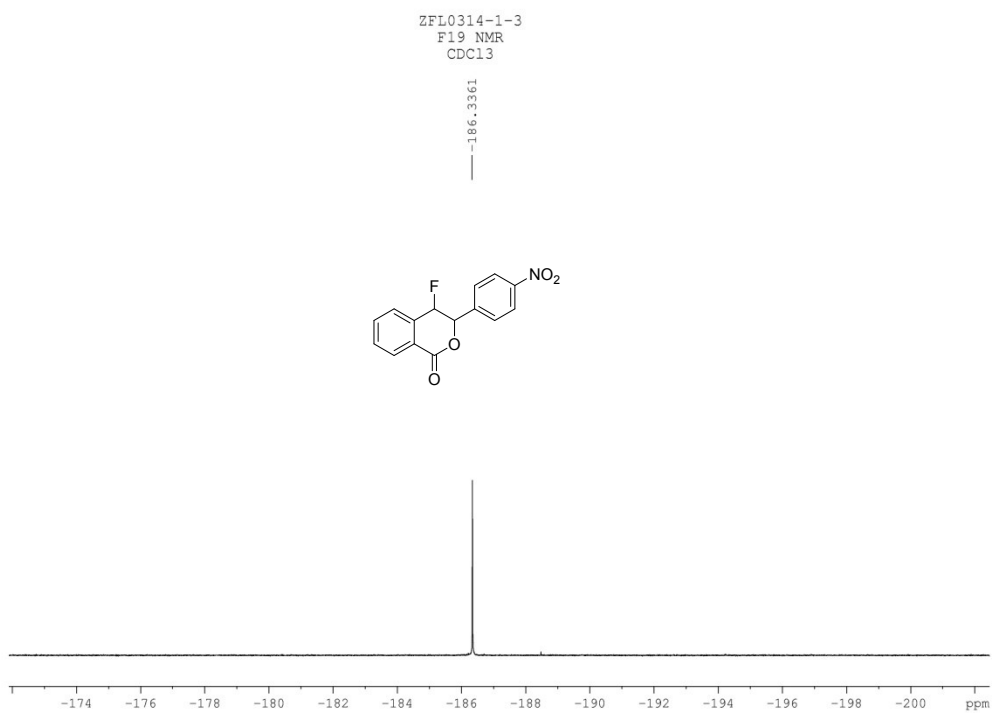

**Fig. 24** <sup>19</sup>F NMR spectrum of compound **3h**

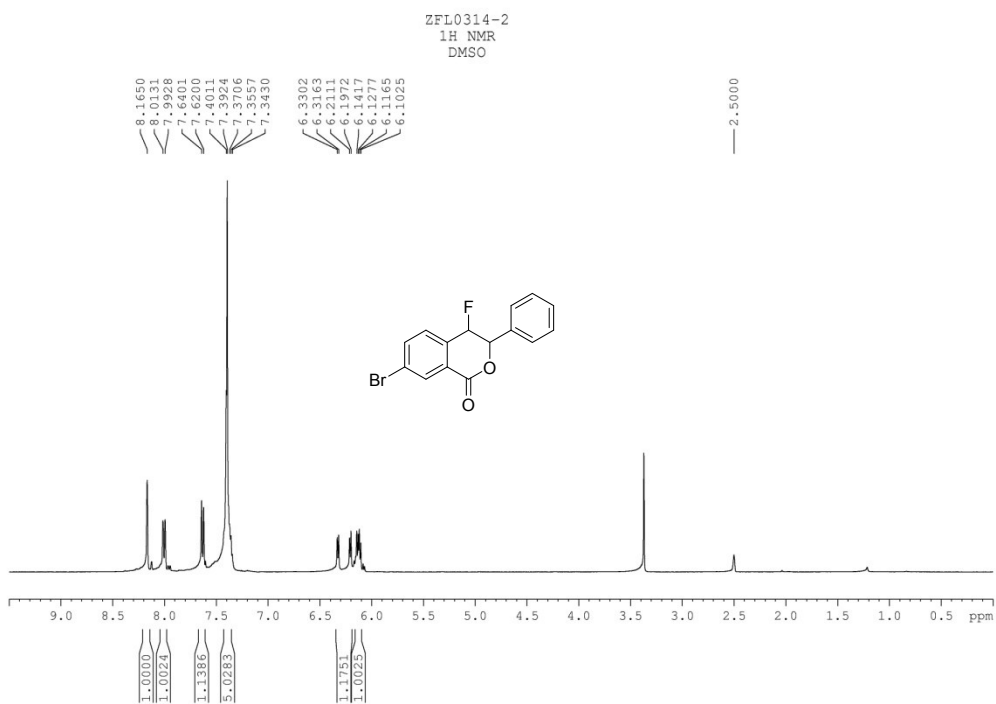

Fig. 25 <sup>1</sup>H NMR spectrum of compound 3i

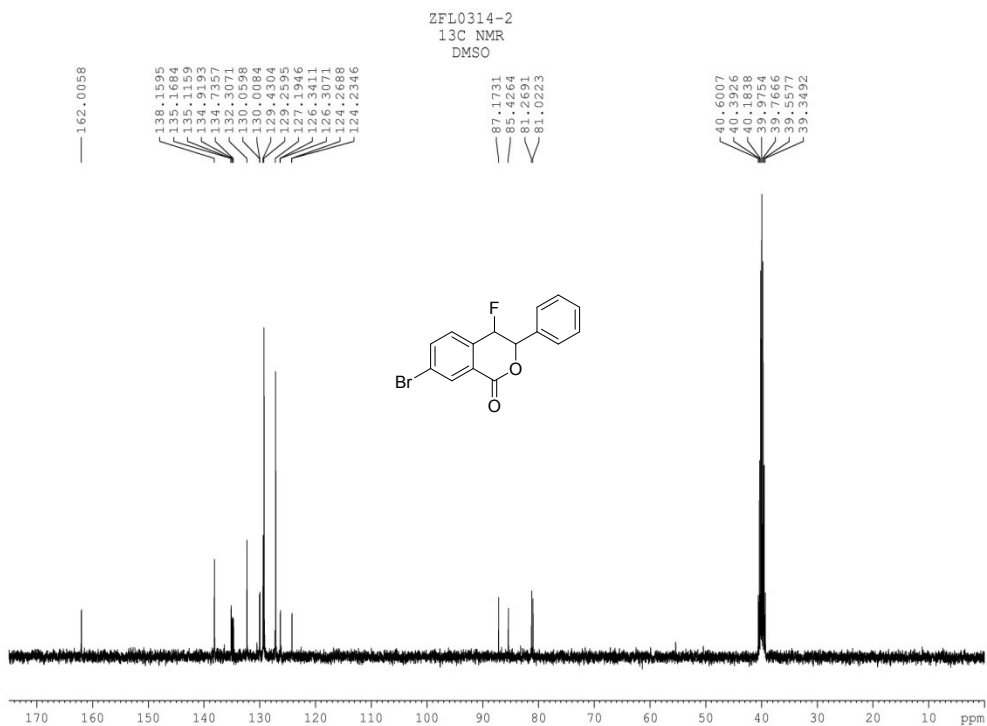

Fig. 26 <sup>13</sup>C NMR spectrum of compound 3i

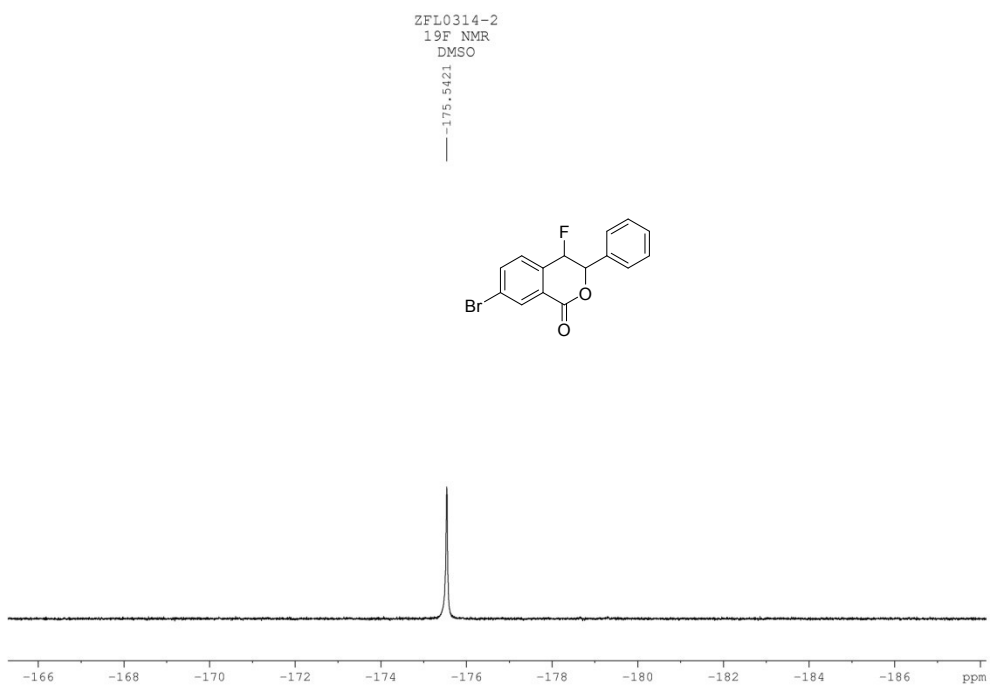

Fig. 27 <sup>19</sup>F NMR spectrum of compound **3i**

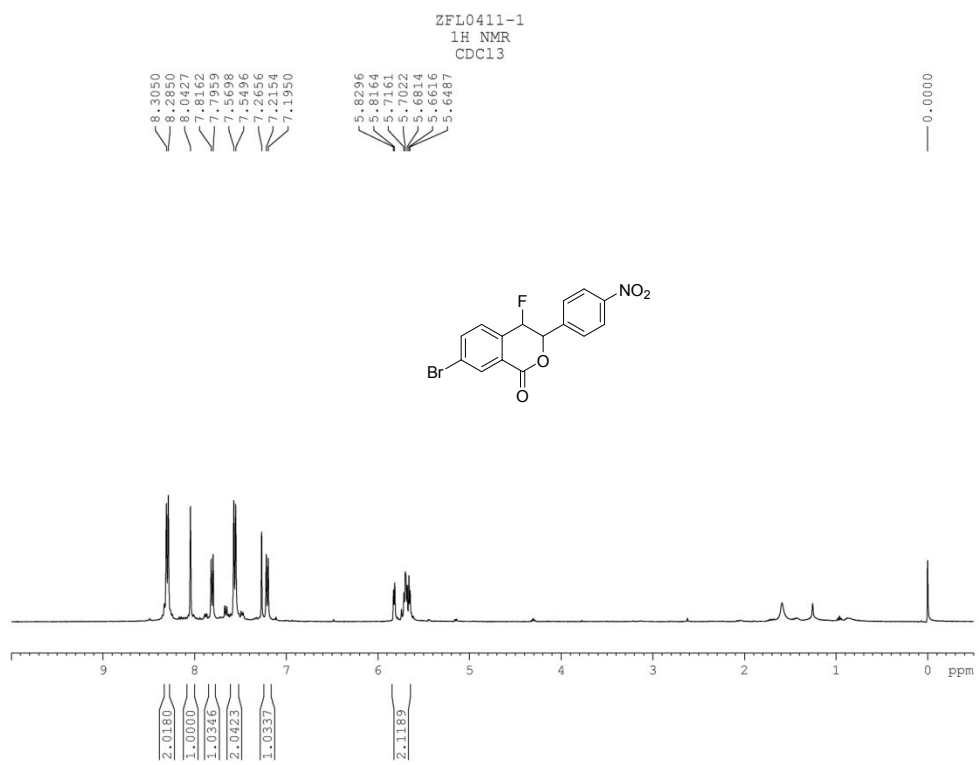

Fig. 28 <sup>1</sup>H NMR spectrum of compound **3j**



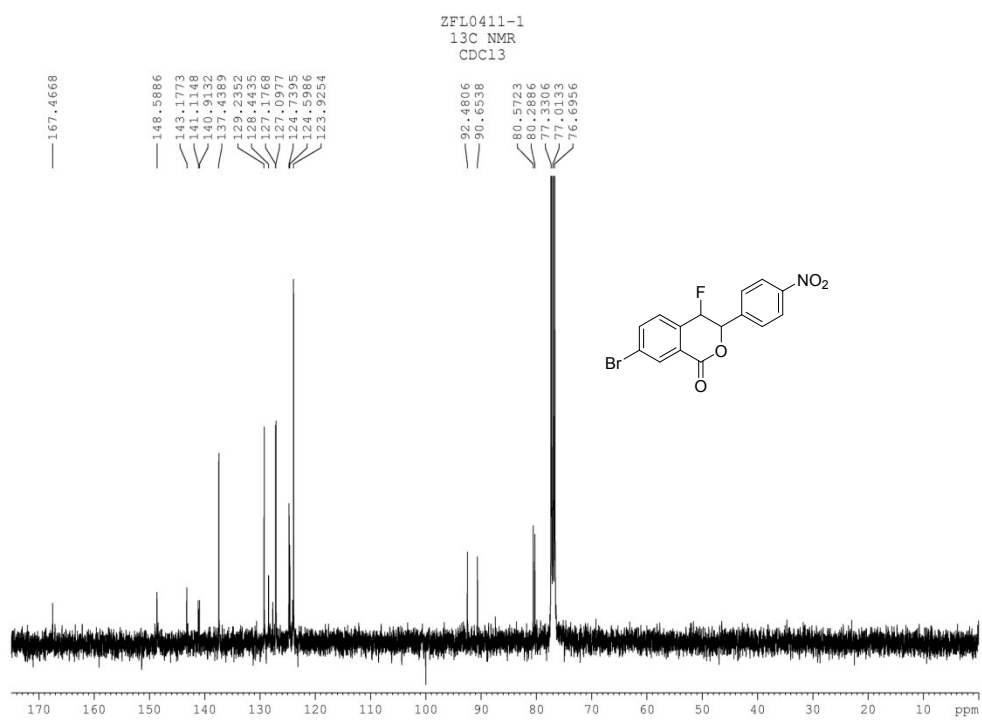

Fig. 29 <sup>13</sup>C NMR spectrum of compound **3j**

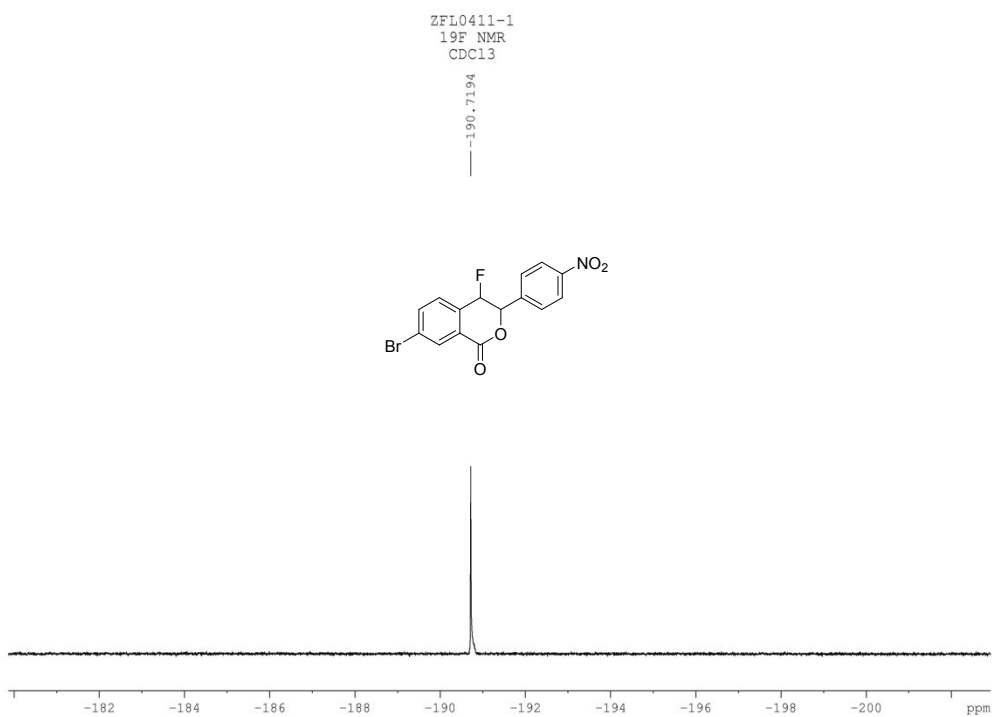

Fig. 30 <sup>19</sup>F NMR spectrum of compound **3j**

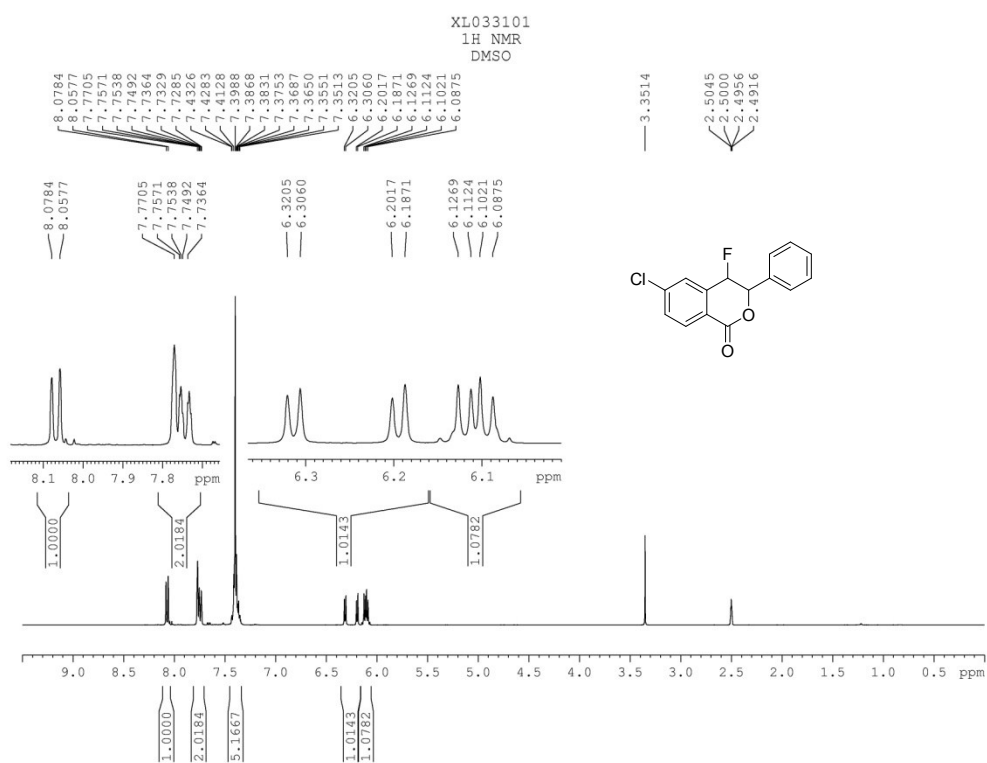

Fig. 31 <sup>1</sup>H NMR spectrum of compound 3k

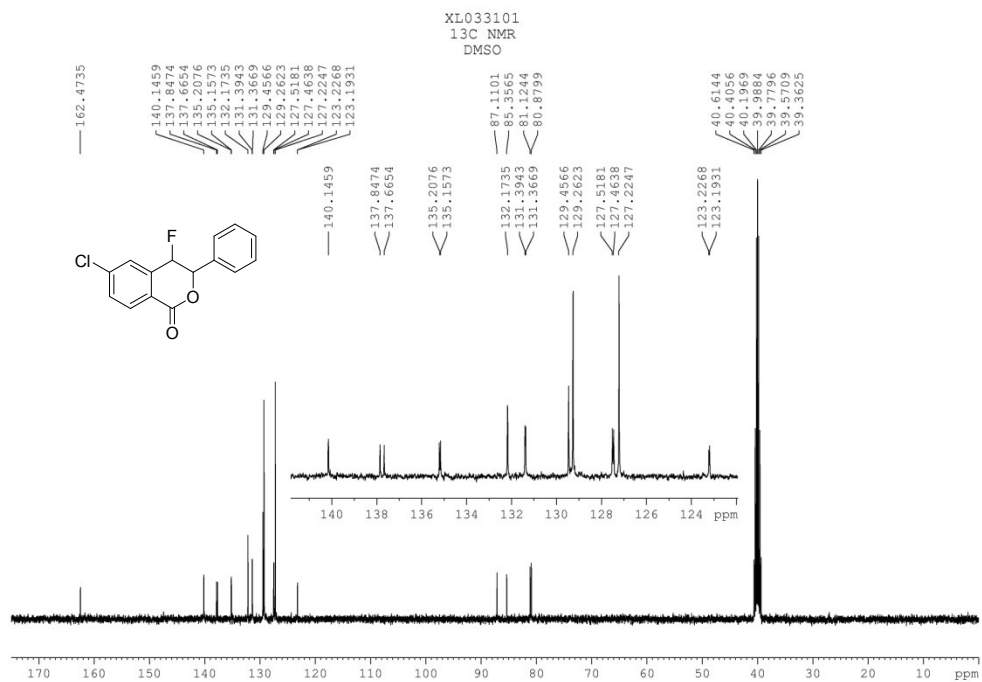

Fig. 32 <sup>13</sup>C NMR spectrum of compound 3k

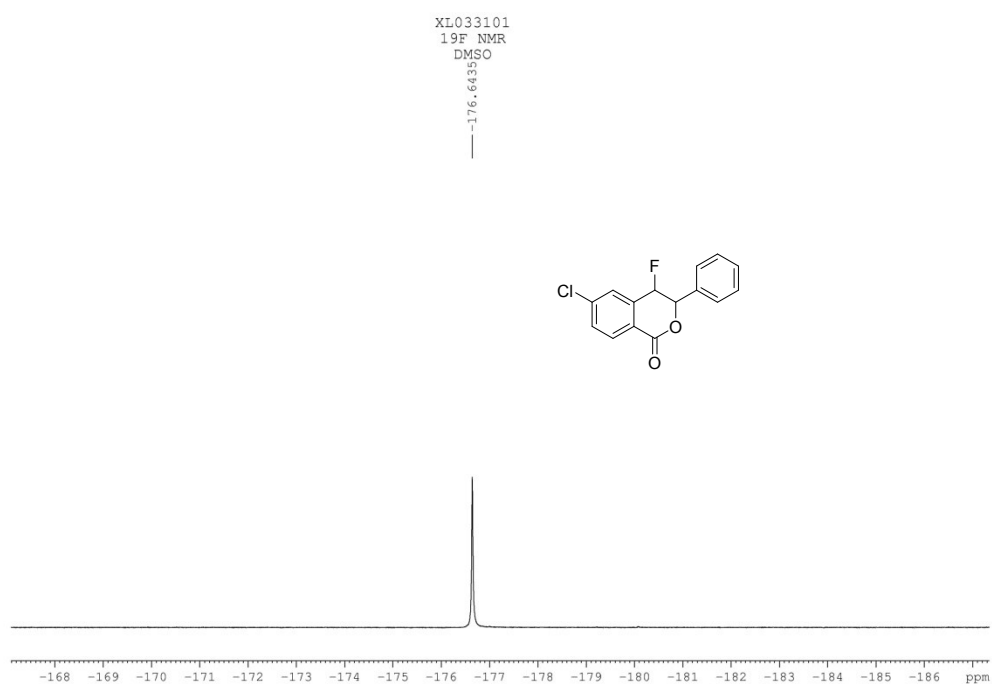

**Fig. 33**  $^{19}\text{F}$  NMR spectrum of compound **3k**

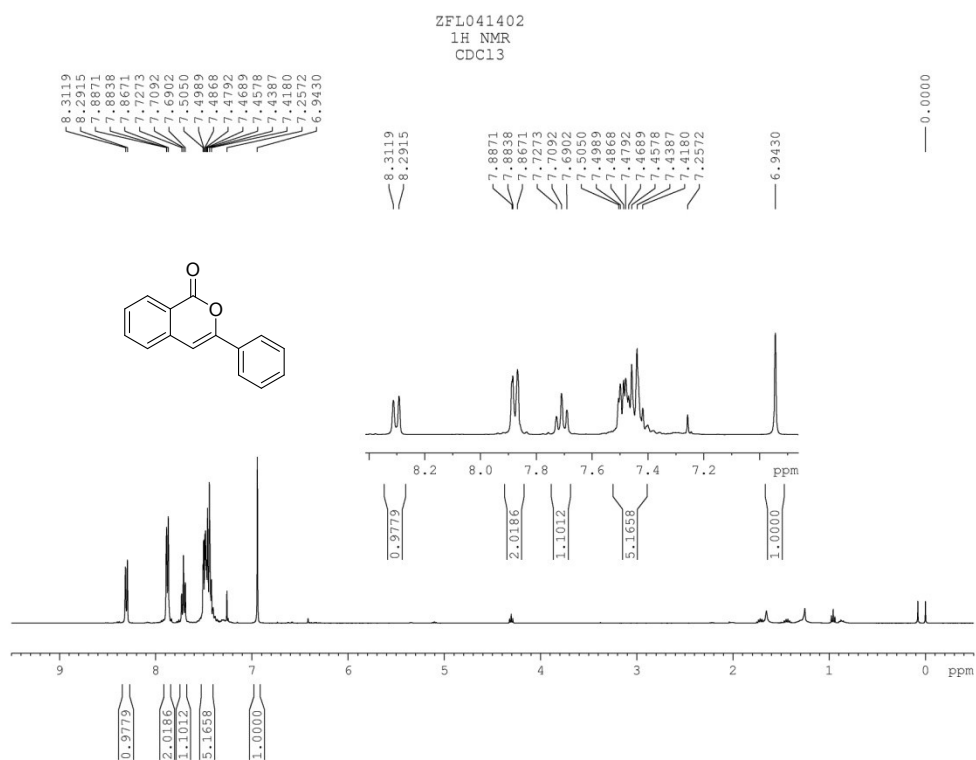

**Fig. 34**  $^1\text{H}$  NMR spectrum of compound **4a**

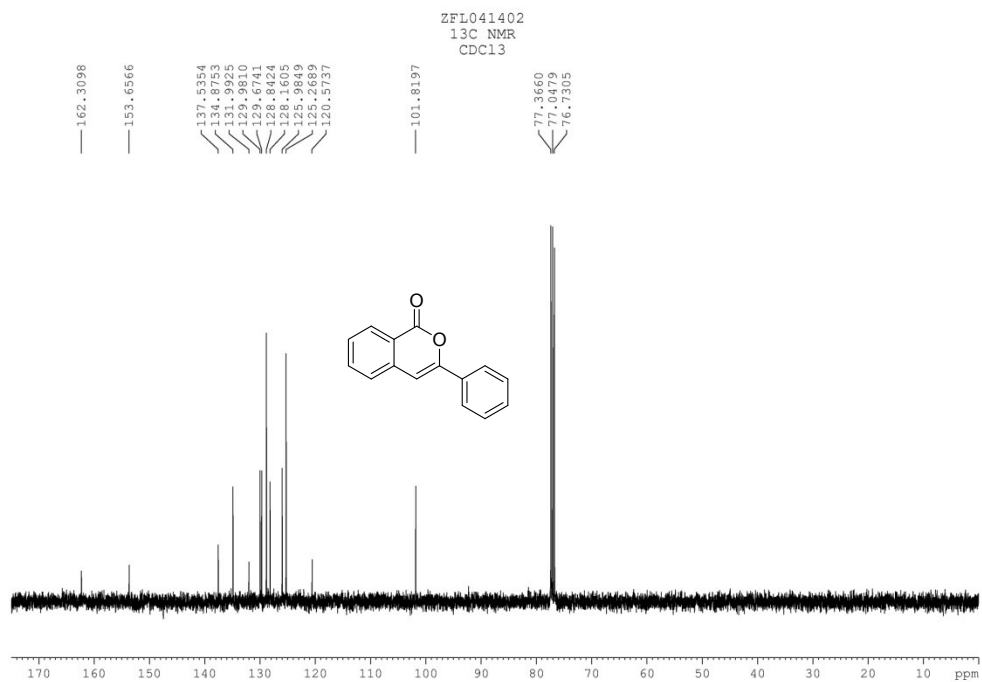

Fig. 35 <sup>13</sup>C NMR spectrum of compound 4a

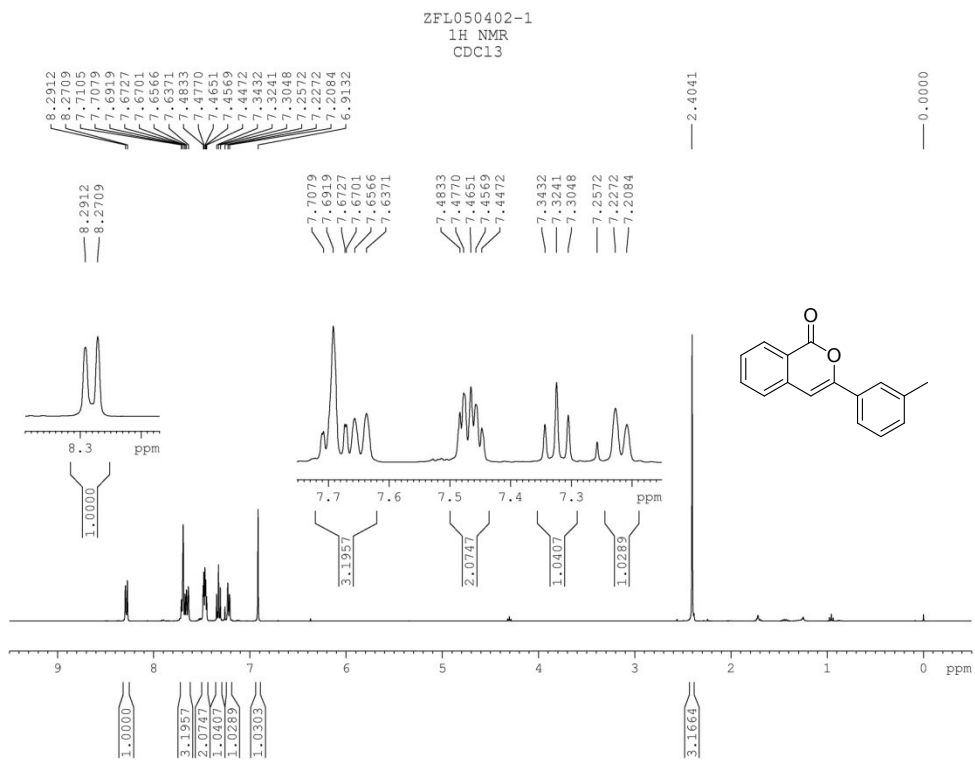

Fig. 36 <sup>1</sup>H NMR spectrum of compound 4b

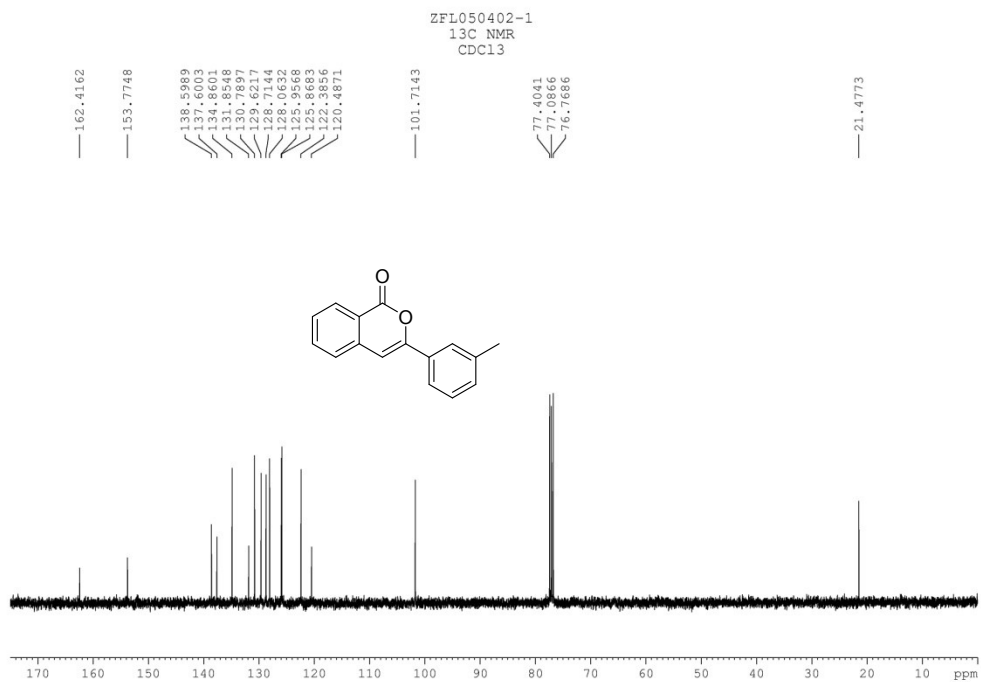

Fig. 37 <sup>13</sup>C NMR spectrum of compound 4b

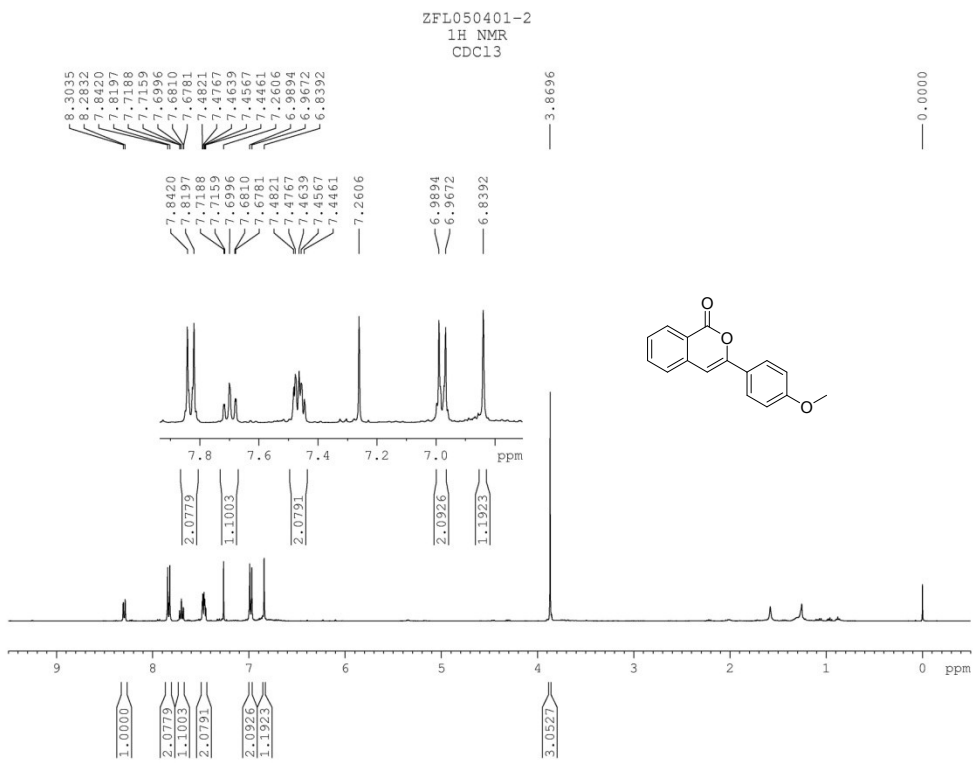

Fig. 38 <sup>1</sup>H NMR spectrum of compound 4c

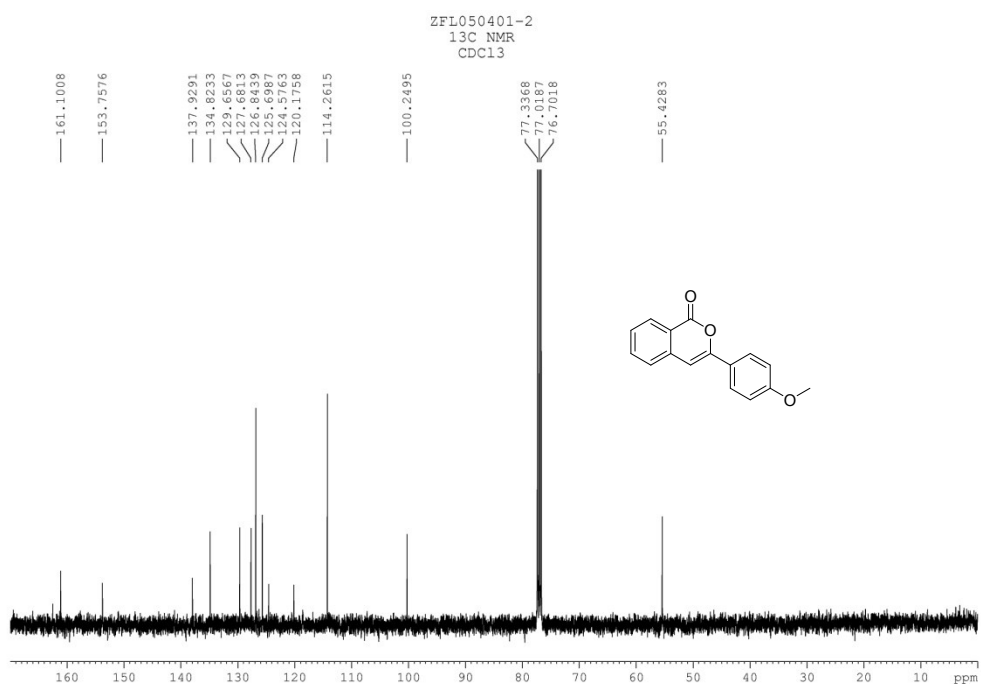

Fig. 39 <sup>13</sup>C NMR spectrum of compound 4c

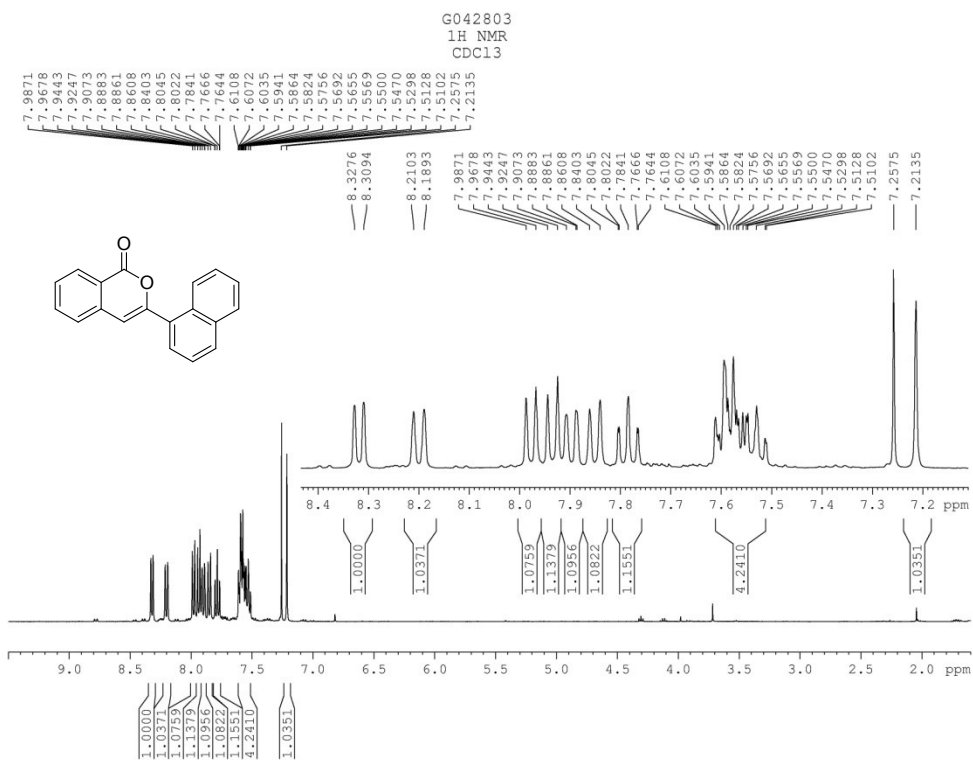

Fig. 40 <sup>1</sup>H NMR spectrum of compound 4d

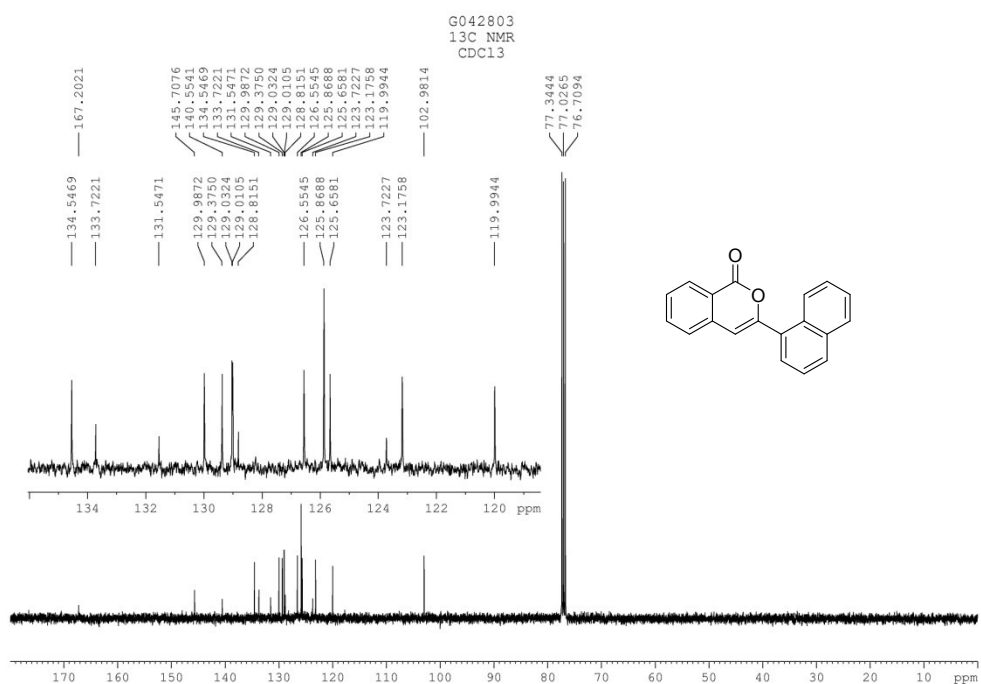

Fig. 41 <sup>13</sup>C NMR spectrum of compound 4d

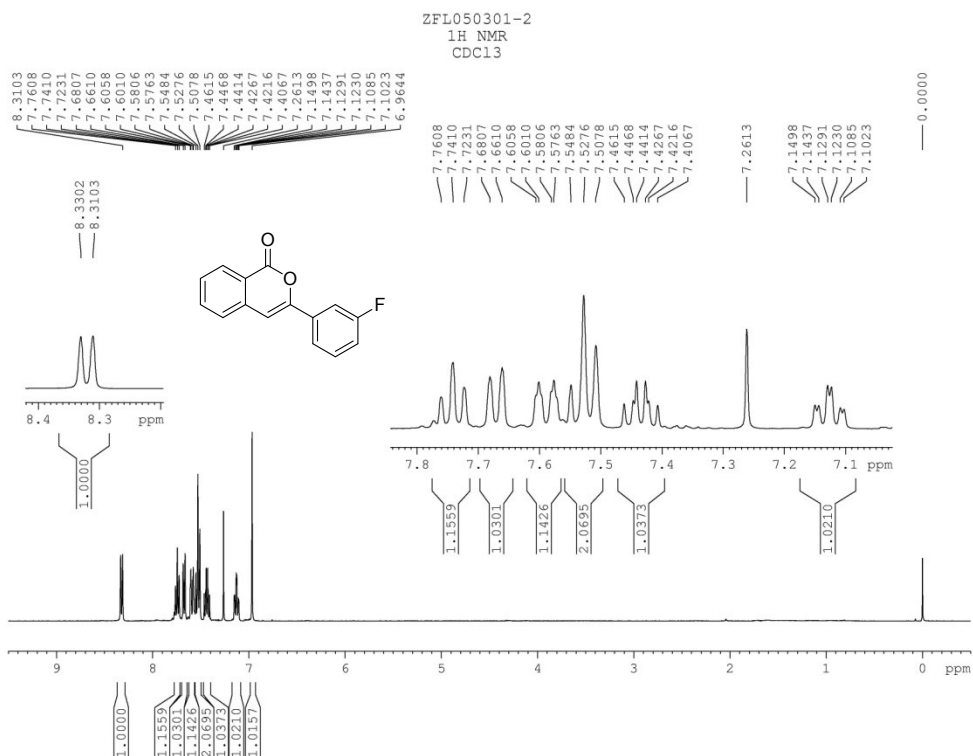

Fig. 42 <sup>1</sup>H NMR spectrum of compound 4e

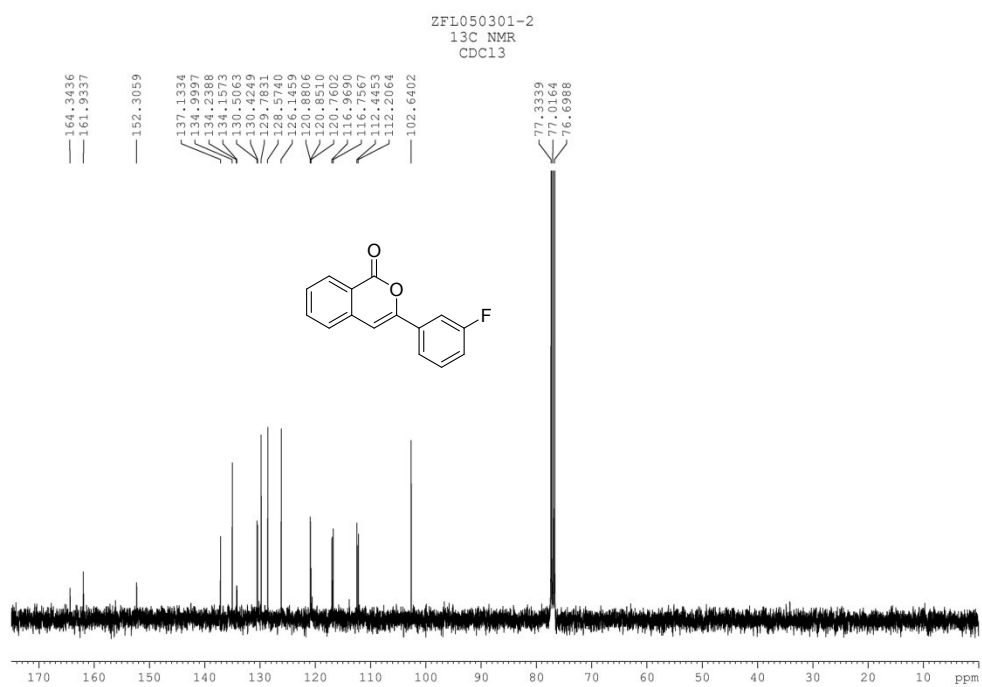

**Fig. 43** <sup>13</sup>C NMR spectrum of compound **4e**

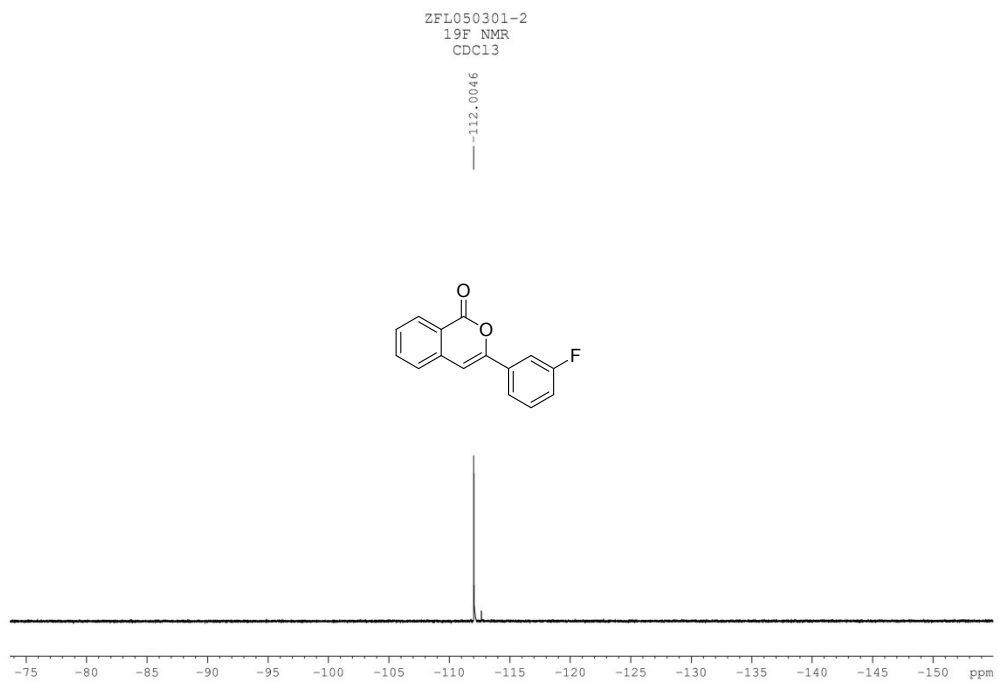

**Fig. 44** <sup>19</sup>F NMR spectrum of compound **4e**



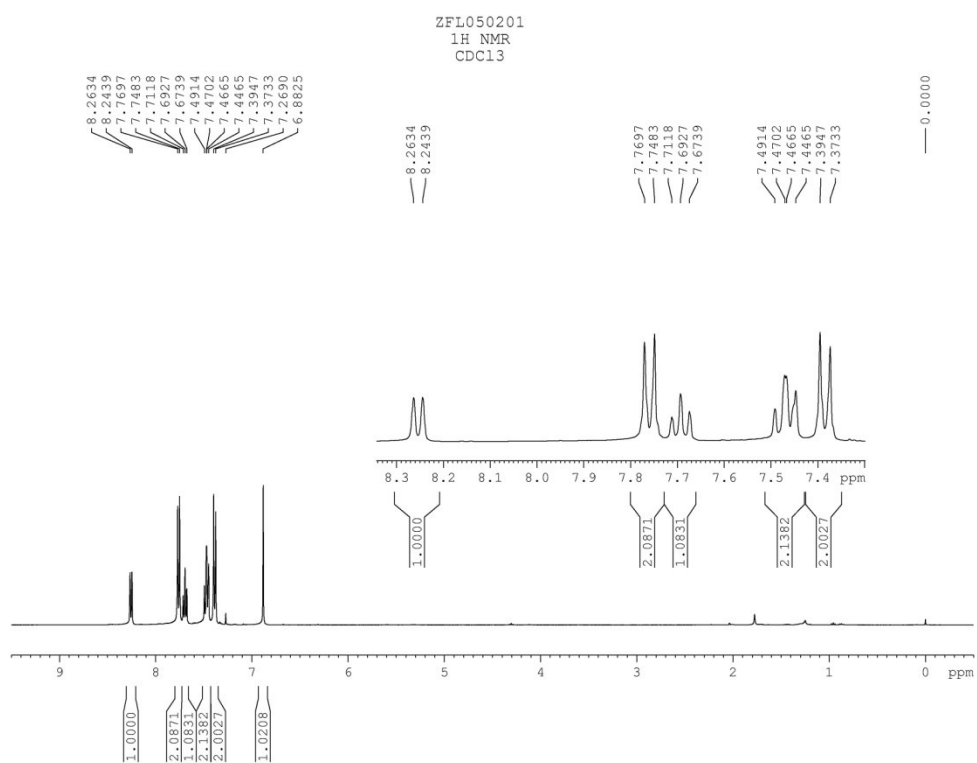

Fig. 45  $^1\text{H}$  NMR spectrum of compound 4f

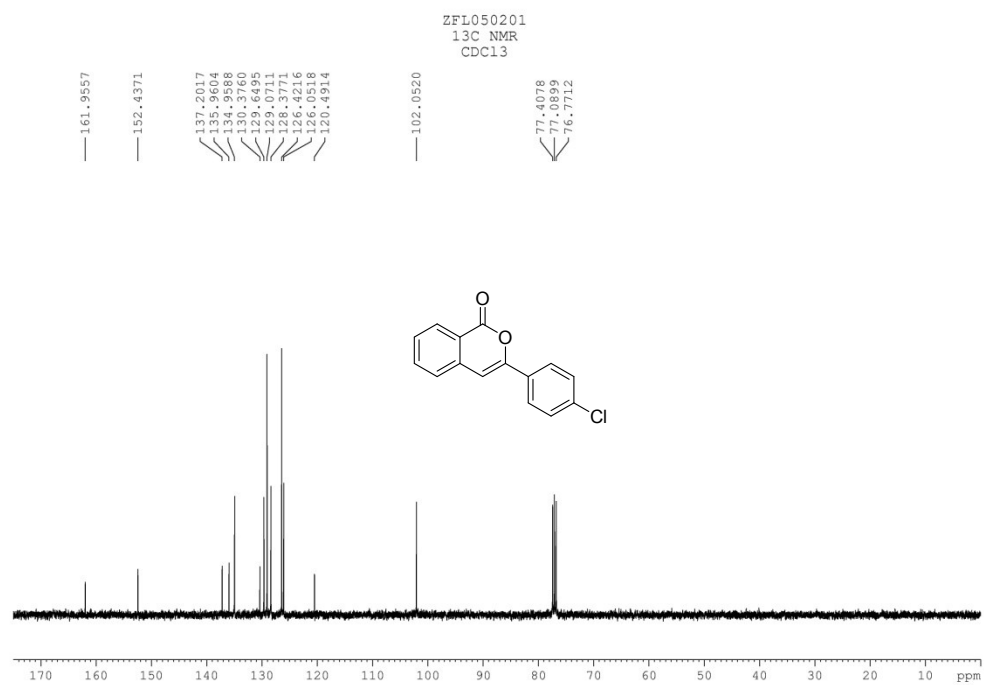

Fig. 46  $^{13}\text{C}$  NMR spectrum of compound 4f

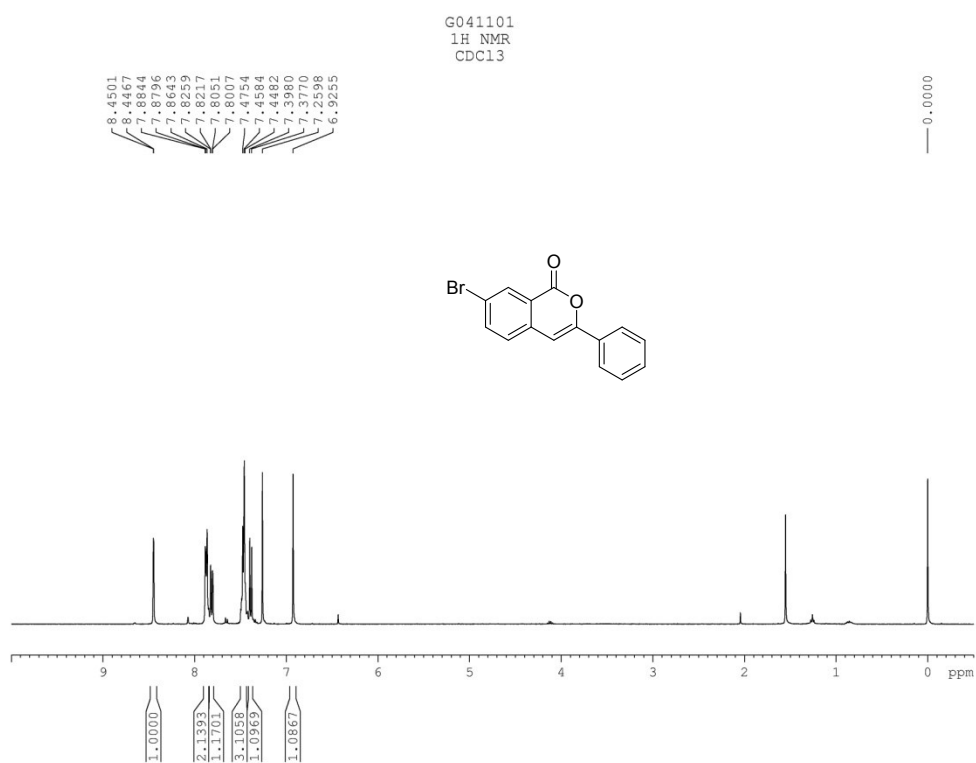

Fig. 47  $^1\text{H}$  NMR spectrum of compound **4g**

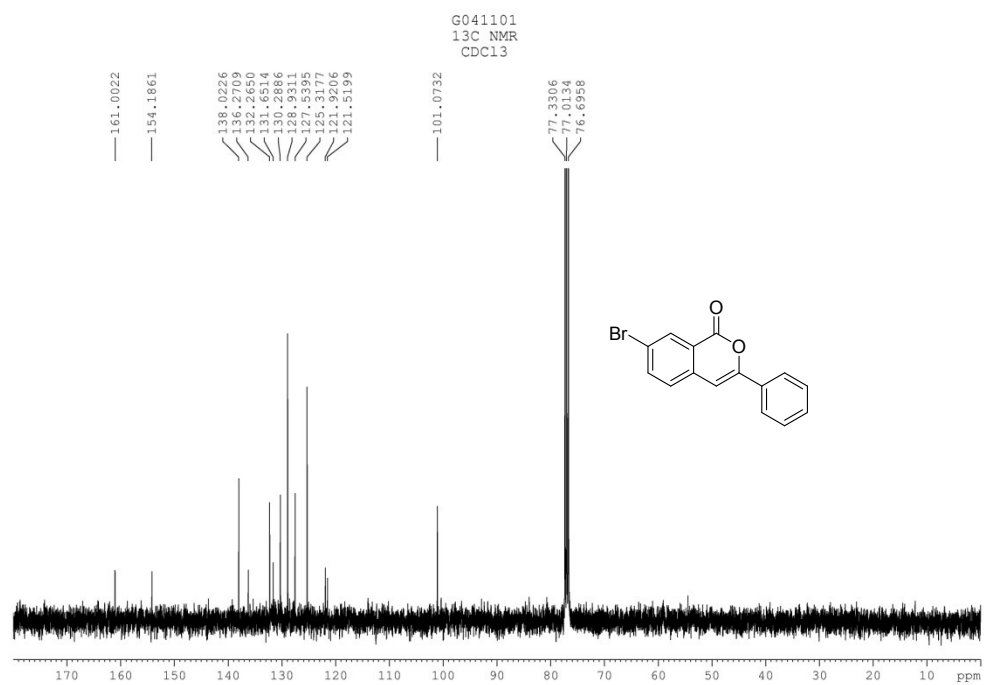

Fig. 48  $^{13}\text{C}$  NMR spectrum of compound **4g**
